# Supplementary material for: Using non-empirically tuned range-separated functionals with simulated emission bands to model fluorescence lifetimes
Source: Royal Society of Chemistry journal article supplement (doi:10.1039/c7cp03418k), 2017-01-01
Supplement: c7cp03418k1.pdf [file c7cp03418k1.pdf]

## **Supporting Information**

- 1. Experimental data for all molecules investigated**
- 2. Gas phase ground state B3LYP/6-31+G(d) optimised geometries for molecules in the test subset**
- 3. Tuned range-separation parameters for all molecules**
- 4. Basis set effect on vertical excitation energies**
- 5. Effect of spectral HWHM on the calculated fluorescence lifetimes**
- 6. Charge-transfer diagnostics for VI**
- 7. Fluorescence lifetime calculations for all functionals and molecules investigated**
- 8. Ground and excited state optimised geometries for all molecules using the LC-BLYP\* functional**
- 9. Dependence of the range-separation parameter on the basis set and molecular geometry**

## 1. Experimental data for all molecules investigated

Table S1: Experimental quantum yields and fluorescence lifetimes (in ns) of all molecules investigated in this study, as taken from the literature.

|              | <b>Solvent</b>    | $\phi_f$ | $\tau_f$ | <b>Ref.</b> |
|--------------|-------------------|----------|----------|-------------|
| <b>I</b>     | Cyclohexane       | 0.92     | 12.7     | 1           |
| <b>II</b>    | Cyclohexane       | 0.87     | 11.5     | 2,3         |
| <b>III</b>   | Acetonitrile      | 0.98     | 5.5      | 4           |
| <b>IV</b>    | MethylCyclohexane | 0.97     | 6.2      | 4           |
| <b>V</b>     | Cyclohexane       | 1.00     | 7.5      | 1           |
| <b>VI</b>    | Ethanol           | 0.97     | 10.5     | 5           |
| <b>VII</b>   | Ethanol           | 0.98     | 10.6     | 5           |
| <b>VIII</b>  | Ethanol           | 0.99     | 10.7     | 5           |
| <b>IX</b>    | Cyclohexane       | 0.94     | 1.36     | 1           |
| <b>X</b>     | Methanol          | 0.85     | 1.17     | 1           |
| <b>XI</b>    | 1,4-dioxane       | 0.90     | 0.64     | 6           |
| <b>XII</b>   | Cyclohexane       | 0.82     | 0.87     | 7           |
| <b>XIII</b>  | 1,4-dioxane       | 0.92     | 7.4      | 8           |
| <b>XIV</b>   | 1,4-dioxane       | 0.97     | 9.8      | 8           |
| <b>XV</b>    | 1,4-dioxane       | 1.00     | 17.0     | 8           |
| <b>XVI</b>   | 1,4-dioxane       | 1.00     | 10.7     | 8           |
| <b>XVII</b>  | 1,4-dioxane       | 0.90     | 12.3     | 8           |
| <b>XVIII</b> | 1,4-dioxane       | 0.78     | 9.0      | 8           |
| <b>XIX</b>   | Acetonitrile      | 0.92     | 5.2      | 9           |
| <b>XX</b>    | Acetonitrile      | 0.80     | 3.5      | 9           |
| <b>XXI</b>   | Ethyl Acetate     | 0.99     | 3.1      | 9           |
| <b>XXII</b>  | Cyclohexane       | 1.00     | 4.1      | 9           |
| <b>XXIII</b> | Ethanol           | 0.93     | 5.4      | 9           |
| <b>XXIV</b>  | Toluene           | 0.90     | 3.3      | 10          |

Table S2: Experimental absorption ( $\lambda_{abs}$ ), emission ( $\lambda_{emi}$ ) and Stokes shift of all molecules in solvent investigated in this study, as taken from the literature. All values are in eV

|              | <b>Solvent</b>    | $\lambda_{abs}$ | $\lambda_{emi}$ | <b>Stokes shift</b> | <b>Ref.</b> |
|--------------|-------------------|-----------------|-----------------|---------------------|-------------|
| <b>I</b>     | Cyclohexane       | 3.271           | 3.084           | 0.187               | 1           |
| <b>II</b>    | Cyclohexane       | 2.959           | 2.938           | 0.021               | 2           |
| <b>III</b>   | Acetonitrile      | 2.863           | 2.837           | 0.026               | 4           |
| <b>IV</b>    | MethylCyclohexane | 2.837           | 2.799           | 0.038               | 4           |
| <b>V</b>     | Cyclohexane       | 3.324           | 3.061           | 0.263               | 1           |
| <b>VI</b>    | Ethanol           | 3.116           | 3.002           | 0.114               | 5           |
| <b>VII</b>   | Ethanol           | 3.080           | 2.931           | 0.149               | 5           |
| <b>VIII</b>  | Ethanol           | 3.123           | 2.994           | 0.129               | 5           |
| <b>IX</b>    | Cyclohexane       | 4.092           | 3.473           | 0.619               | 1           |
| <b>X</b>     | Methanol          | 4.476           | 3.690           | 0.786               | 1           |
| <b>XI</b>    | 1,4-dioxane       | 3.875           | 3.573           | 0.301               | 6           |
| <b>XII</b>   | Cyclohexane       | 4.240           | 3.397           | 0.843               | 7           |
| <b>XIII</b>  | 1,4-dioxane       | 3.408           | 3.174           | 0.234               | 8           |
| <b>XIV</b>   | 1,4-dioxane       | 3.495           | 3.196           | 0.299               | 8           |
| <b>XV</b>    | 1,4-dioxane       | 3.647           | 2.871           | 0.776               | 8           |
| <b>XVI</b>   | 1,4-dioxane       | 3.369           | 2.888           | 0.481               | 8           |
| <b>XVII</b>  | 1,4-dioxane       | 3.447           | 2.944           | 0.503               | 8           |
| <b>XVIII</b> | 1,4-dioxane       | 4.003           | 2.862           | 1.140               | 8           |
| <b>XIX</b>   | Acetonitrile      | 3.397           | 2.666           | 0.731               | 9           |
| <b>XX</b>    | Acetonitrile      | 3.502           | 2.952           | 0.550               | 9           |
| <b>XXI</b>   | Ethyl Acetate     | 3.434           | 2.980           | 0.454               | 9           |
| <b>XXII</b>  | Cyclohexane       | 3.297           | 2.863           | 0.434               | 9           |
| <b>XXIII</b> | Ethanol           | 3.031           | 2.475           | 0.557               | 9           |
| <b>XXIV</b>  | Toluene           | 3.289           | 2.792           | 0.496               | 10          |

Table S3: Refractive index ( $n$ ) of all solvents used in the calculation of fluorescence lifetimes. All values were taken from the CRC Handbook of Chemistry and Physics.<sup>11</sup>

| <b>Solvent</b>    | <b><math>n</math></b> |
|-------------------|-----------------------|
| 1,4-dioxane       | 1.4224                |
| Acetonitrile      | 1.3442                |
| Cyclohexane       | 1.4235                |
| Ethanol           | 1.3611                |
| Ethyl Acetate     | 1.3723                |
| Methanol          | 1.3288                |
| MethylCyclohexane | 1.4231                |
| Toluene           | 1.4941                |

## 2. Gas phase ground state B3LYP/6-31+G(d) optimised geometries for molecules in the test set

### I

C -9.640514 -1.130303 -0.002846  
C -8.269467 -1.111809 0.000707  
C -7.551194 0.125649 0.003561  
C -8.293358 1.362565 0.002645  
C -9.720486 1.302363 -0.001096  
C -10.371540 0.093228 -0.003745  
C -6.150884 0.163675 0.007213  
C -7.575368 2.585300 0.005484  
C -6.157870 2.618744 0.009168  
C -5.437244 1.369145 0.010017  
C -4.006734 1.395718 0.013725  
H -3.471414 0.449067 0.014350  
C -3.324322 2.585027 0.016418  
C -4.038598 3.818392 0.015573  
C -5.411713 3.836853 0.012067  
H -5.598948 -0.774501 0.007891  
H -10.175991 -2.075787 -0.004998  
H -7.702012 -2.039568 0.001419  
H -10.286661 2.229171 -0.001815  
H -11.457919 0.066525 -0.006558  
H -2.237776 2.593641 0.019200  
H -3.487473 4.754986 0.017743  
H -5.946600 4.782062 0.011456  
C -8.300969 3.818681 0.004623  
N -8.891911 4.823125 0.003924

## VI

C -7.688542 -5.356115 -0.065777  
C -6.303897 -5.387261 0.000062  
C -5.549260 -4.199142 -0.012249  
C -6.225081 -2.960229 -0.093340  
C -7.632994 -2.929316 -0.160393  
C -8.350396 -4.116187 -0.146237  
C -4.073100 -4.250911 0.058865  
C -4.120228 -1.739483 -0.044134  
C -3.383328 -2.942978 0.038202  
C -1.978638 -2.878966 0.100659  
H -1.438076 -3.818496 0.163540  
C -1.316566 -1.660807 0.082334  
C -2.061292 -0.468905 0.000217  
C -3.446413 -0.501213 -0.062506  
H -8.260684 -6.279305 -0.055396  
H -5.759151 -6.324371 0.063061  
H -8.149527 -1.973493 -0.223117  
H -9.435676 -4.082586 -0.197958  
H -0.232136 -1.623259 0.130664  
H -1.550201 0.490369 -0.014715  
H -4.017456 0.422997 -0.126064  
N -5.499774 -1.784310 -0.106516  
H -6.005219 -0.910365 -0.166635  
O -3.455781 -5.318284 0.130834

## IX

C -7.233047 0.816458 -1.080443

C -7.239141 0.809780 1.106539

C -8.003272 -0.216742 0.617344

H -8.560002 -0.964802 1.163741

C -6.882760 1.288651 2.434371

C -6.042744 2.404340 2.605189

C -7.379261 0.634220 3.578686

C -5.710600 2.849881 3.885043

H -5.652261 2.918638 1.732929

C -7.043839 1.083800 4.853615

H -8.029879 -0.229193 3.469206

C -6.207639 2.194363 5.014682

H -5.060312 3.713537 3.998533

H -7.436587 0.566012 5.724883

H -5.947420 2.543635 6.010271

C -6.876069 1.294515 -2.411857

C -6.042239 2.411882 -2.589766

C -7.378425 0.620738 -3.539840

C -5.718032 2.845568 -3.875470

H -5.651334 2.935745 -1.723200

C -7.049839 1.060183 -4.820369

H -8.021698 -0.241405 -3.394912

C -6.219256 2.173277 -4.994113

H -5.072533 3.710666 -4.003262

H -7.442658 0.533316 -5.686100

H -5.964888 2.513736 -5.994472

O -6.740819 1.478074 0.008952

N -7.990146 -0.200002 -0.761366

### **XIII**

C -1.255828 -1.346022 -0.182851

C -0.022441 -2.130289 0.000937

C 1.042626 -1.290890 -0.041310

C 1.044062 1.287450 -0.086706

C -0.020065 2.129010 -0.074103

C -1.254328 1.340145 -0.230277

N 0.607083 -0.005501 -0.292505

N -0.770350 -0.006371 -0.385161

O -2.422537 -1.675799 -0.188381

O -2.420664 1.670832 -0.247481

H 2.104260 1.482699 0.008541

H 2.102612 -1.483890 0.060664

H -0.011433 -3.201805 0.134577

H -0.007863 3.204555 0.021716



## **XIX**

C -7.278096 -2.321418 -0.048780

C -5.878242 -2.279564 0.012173

C -5.225888 -1.052105 0.023848

C -5.923945 0.176255 -0.021729

C -7.334821 0.109344 -0.083475

C -7.998024 -1.102434 -0.097094

H -5.284406 -3.188044 0.045578

C -5.124265 1.378600 0.000278

H -7.915803 1.023497 -0.119881

H -9.083358 -1.123068 -0.151176

C -3.769146 1.317471 0.062379

C -3.064986 0.043530 0.109819

H -3.145488 2.201687 0.079804

N -7.947005 -3.528812 -0.112461

H -7.450442 -4.359552 0.180854

H -8.929782 -3.534296 0.125352

C -5.798470 2.734491 -0.049187

F -6.650598 2.904584 0.994498

F -4.918870 3.755850 -0.010306

F -6.529911 2.883036 -1.183304

O -3.861170 -1.097731 0.086290

O -1.864636 -0.101635 0.167281

### 3. Tuned range-separation parameters for all molecules

Table S4. Tuned range separation parameter  $\gamma$  (Bohr<sup>-1</sup>) for all molecules with the LC-BLYP\* and  $\omega$ B97X\* functionals. The default values for LC-BLYP and  $\omega$ B97X are 0.4700 Bohr<sup>-1</sup> and 0.3000 Bohr<sup>-1</sup> respectively. R<sup>2</sup> refers to the coefficient of determination for the fit.

|              | LC-BLYP* |                | $\omega$ B97X* |                |
|--------------|----------|----------------|----------------|----------------|
|              | $\gamma$ | R <sup>2</sup> | $\gamma$       | R <sup>2</sup> |
| <b>I</b>     | 0.2216   | 0.9997         | 0.1900         | 0.9996         |
| <b>II</b>    | 0.2159   | 0.9997         | 0.1850         | 0.9995         |
| <b>III</b>   | 0.2098   | 0.9994         | 0.1797         | 0.9990         |
| <b>IV</b>    | 0.2151   | 0.9996         | 0.1841         | 0.9992         |
| <b>V</b>     | 0.1831   | 0.9993         | 0.1373         | 0.9994         |
| <b>VI</b>    | 0.2333   | 0.9998         | 0.1974         | 0.9997         |
| <b>VII</b>   | 0.2230   | 0.9997         | 0.1886         | 0.9995         |
| <b>VIII</b>  | 0.2052   | 0.9998         | 0.1730         | 0.9997         |
| <b>IX</b>    | 0.2143   | 0.9999         | 0.1833         | 0.9997         |
| <b>X</b>     | 0.2066   | 0.9998         | 0.1770         | 0.9997         |
| <b>XI</b>    | 0.1933   | 0.9998         | 0.1649         | 0.9999         |
| <b>XII</b>   | 0.1911   | 0.9997         | 0.1646         | 0.9998         |
| <b>XIII</b>  | 0.2829   | 0.9999         | 0.2398         | 0.9999         |
| <b>XIV</b>   | 0.2592   | 0.9999         | 0.2194         | 0.9999         |
| <b>XV</b>    | 0.2652   | 1.0000         | 0.2256         | 0.9999         |
| <b>XVI</b>   | 0.2399   | 0.9999         | 0.2035         | 0.9998         |
| <b>XVII</b>  | 0.2393   | 0.9999         | 0.2028         | 0.9998         |
| <b>XVIII</b> | 0.2429   | 1.0000         | 0.2059         | 0.9999         |
| <b>XIX</b>   | 0.2468   | 0.9999         | 0.2106         | 0.9999         |
| <b>XX</b>    | 0.2249   | 1.0000         | 0.1907         | 0.9999         |
| <b>XXI</b>   | 0.2220   | 0.9999         | 0.1858         | 1.0000         |
| <b>XXII</b>  | 0.2200   | 1.0000         | 0.1854         | 0.9998         |
| <b>XXIII</b> | 0.2120   | 1.0000         | 0.1785         | 0.9998         |
| <b>XXIV</b>  | 0.2101   | 1.0000         | 0.1782         | 0.9998         |

#### 4. Basis set effect on vertical excitation energies

The geometries used here are those from Section 2 of the Supporting Information

Table S5. Basis set effect on the gas phase vertical excitation energies (in eV) of **I** calculated using TD-DFT. Oscillator strengths are given in parentheses.

|                                 | <b>6-31+G*</b>     | <b>6-311+G*</b>    | <b>def2TZVP</b>    | <b>aug-cc-pVDZ</b> | <b>aug-cc-pVTZ</b> |
|---------------------------------|--------------------|--------------------|--------------------|--------------------|--------------------|
| <b>B3LYP</b>                    | 3.0320<br>(0.0963) | 3.0111<br>(0.0923) | 2.9955<br>(0.0864) | 2.9903<br>(0.0857) | 2.9833<br>(0.0854) |
| <b>BMK</b>                      | 3.3087<br>(0.1239) | 3.2877<br>(0.1188) | 3.2661<br>(0.1117) | 3.2582<br>(0.1087) | 3.2514<br>(0.1089) |
| <b>CAM-<br/>B3LYP</b>           | 3.3484<br>(0.1376) | 3.3209<br>(0.1314) | 3.2965<br>(0.1216) | 3.2907<br>(0.1200) | 3.2817<br>(0.1195) |
| <b>LC-BLYP</b>                  | 3.6388<br>(0.1781) | 3.6037<br>(0.1691) | 3.5681<br>(0.1547) | 3.5637<br>(0.1521) | 3.5516<br>(0.1510) |
| <b>M06</b>                      | 3.0175<br>(0.1027) | 3.0062<br>(0.0982) | 2.9925<br>(0.0932) | 2.9701<br>(0.0908) | 2.9849<br>(0.0911) |
| <b>M06-2X</b>                   | 3.3813<br>(0.1314) | 3.3477<br>(0.1259) | 3.3345<br>(0.1176) | 3.3200<br>(0.1139) | 3.3087<br>(0.1144) |
| <b>M11</b>                      | 3.5354<br>(0.1598) | 3.4807<br>(0.1530) | 3.4632<br>(0.1431) | 3.4711<br>(0.1387) | 3.4356<br>(0.1380) |
| <b>PBE0</b>                     | 3.1138<br>(0.1033) | 3.0918<br>(0.0992) | 3.0718<br>(0.0923) | 3.0670<br>(0.0912) | 3.0596<br>(0.0908) |
| <b><math>\omega</math>B97</b>   | 3.5894<br>(0.1702) | 3.5582<br>(0.1623) | 3.5187<br>(0.1497) | 3.5186<br>(0.1459) | 3.5057<br>(0.1457) |
| <b><math>\omega</math>B97X</b>  | 3.5124<br>(0.1615) | 3.4826<br>(0.1541) | 3.4489<br>(0.1423) | 3.4454<br>(0.1393) | 3.4363<br>(0.1391) |
| <b>LC-BLYP*</b>                 | 3.2655<br>(0.1281) | 3.2398<br>(0.1223) | 3.2163<br>(0.1127) | 3.2091<br>(0.1119) | 3.2010<br>(0.1112) |
| <b><math>\omega</math>B97X*</b> | 3.3107<br>(0.1335) | 3.2858<br>(0.1280) | 3.2607<br>(0.1193) | 3.2556<br>(0.1169) | 3.2503<br>(0.1169) |

Table S6. Basis set effect on the gas phase vertical excitation energies (in eV) of VI calculated using TD-DFT. Oscillator strengths are given in parentheses.

|                                 | <b>6-31+G*</b>     | <b>6-311+G*</b>    | <b>def2TZVP</b>    | <b>aug-cc-pVDZ</b> | <b>aug-cc-pVTZ</b> |
|---------------------------------|--------------------|--------------------|--------------------|--------------------|--------------------|
| <b>B3LYP</b>                    | 3.5521<br>(0.0786) | 3.5215<br>(0.0752) | 3.5100<br>(0.0689) | 3.4823<br>(0.0684) | 3.4847<br>(0.0679) |
| <b>BMK</b>                      | 3.8923<br>(0.1062) | 3.8620<br>(0.1023) | 3.8387<br>(0.0946) | 3.8082<br>(0.0914) | 3.8098<br>(0.0922) |
| <b>CAM-<br/>B3LYP</b>           | 3.9494<br>(0.1152) | 3.9142<br>(0.1101) | 3.8927<br>(0.0996) | 3.8586<br>(0.0988) | 3.8614<br>(0.0982) |
| <b>LC-BLYP</b>                  | 4.2986<br>(0.1483) | 4.2580<br>(0.1413) | 4.2243<br>(0.1267) | 4.1864<br>(0.1250) | 4.1891<br>(0.1241) |
| <b>M06</b>                      | 3.6433<br>(0.0830) | 3.6069<br>(0.0798) | 3.6054<br>(0.0742) | 3.5722<br>(0.0723) | 3.5638<br>(0.0727) |
| <b>M06-2X</b>                   | 3.9435<br>(0.1148) | 3.9159<br>(0.1106) | 3.8930<br>(0.1010) | 3.8477<br>(0.0975) | 3.8639<br>(0.0980) |
| <b>M11</b>                      | 4.0959<br>(0.1333) | 4.0695<br>(0.1285) | 4.0531<br>(0.1182) | 3.9916<br>(0.1130) | 4.0190<br>(0.1143) |
| <b>PBE0</b>                     | 3.6569<br>(0.0856) | 3.6259<br>(0.0823) | 3.6058<br>(0.0001) | 3.5795<br>(0.0740) | 3.5824<br>(0.0736) |
| <b><math>\omega</math>B97</b>   | 4.2301<br>(0.1396) | 4.1887<br>(0.1339) | 4.1574<br>(0.1213) | 4.1188<br>(0.1182) | 4.1231<br>(0.1181) |
| <b><math>\omega</math>B97X</b>  | 4.1427<br>(0.1326) | 4.1039<br>(0.1272) | 4.0736<br>(0.1151) | 4.0394<br>(0.1130) | 4.0418<br>(0.1129) |
| <b>LC-BLYP*</b>                 | 3.7893<br>(0.1059) | 3.7556<br>(0.1010) | 3.7333<br>(0.0902) | 3.6988<br>(0.0904) | 3.7008<br>(0.0897) |
| <b><math>\omega</math>B97X*</b> | 3.9031<br>(0.1107) | 3.8683<br>(0.1065) | 3.8444<br>(0.0970) | 3.8137<br>(0.0953) | 3.8167<br>(0.0954) |

Table S7. Basis set effect on the gas phase vertical excitation energies (in eV) of **IX** calculated using TD-DFT. Oscillator strengths are given in parentheses.

|                                 | <b>6-31+G*</b>     | <b>6-311+G*</b>    | <b>def2TZVP</b>    | <b>aug-cc-pVDZ</b> | <b>aug-cc-pVTZ</b> |
|---------------------------------|--------------------|--------------------|--------------------|--------------------|--------------------|
| <b>B3LYP</b>                    | 3.7743<br>(0.8382) | 3.7574<br>(0.8380) | 3.7617<br>(0.8487) | 3.7376<br>(0.8319) | 3.7255<br>(0.8293) |
| <b>BMK</b>                      | 4.1078<br>(0.9043) | 4.0900<br>(0.9031) | 4.0869<br>(0.9132) | 4.0626<br>(0.9026) | 4.0549<br>(0.8968) |
| <b>CAM-<br/>B3LYP</b>           | 4.1254<br>(0.8694) | 4.1039<br>(0.8710) | 4.1040<br>(0.8889) | 4.0806<br>(0.8701) | 4.0671<br>(0.8668) |
| <b>LC-BLYP</b>                  | 4.4362<br>(0.8512) | 4.4083<br>(0.8534) | 4.3989<br>(0.8743) | 4.3803<br>(0.8590) | 4.3649<br>(0.8548) |
| <b>M06</b>                      | 3.7625<br>(0.8047) | 3.7590<br>(0.8083) | 3.7728<br>(0.8334) | 3.7261<br>(0.8068) | 3.7361<br>(0.8008) |
| <b>M06-2X</b>                   | 4.1714<br>(0.8863) | 4.1451<br>(0.8864) | 4.1580<br>(0.9108) | 4.1255<br>(0.8888) | 4.1096<br>(0.8847) |
| <b>M11</b>                      | 4.3621<br>(0.8801) | 4.3144<br>(0.8768) | 4.3273<br>(0.9209) | 4.3151<br>(0.8901) | 4.2732<br>(0.8821) |
| <b>PBE0</b>                     | 3.8760<br>(0.8604) | 3.8576<br>(0.8611) | 3.8569<br>(0.8734) | 3.8357<br>(0.8571) | 3.8235<br>(0.8547) |
| <b><math>\omega</math>B97</b>   | 4.4027<br>(0.8630) | 4.3764<br>(0.8653) | 4.3565<br>(0.8780) | 4.3494<br>(0.8717) | 4.3309<br>(0.8654) |
| <b><math>\omega</math>B97X</b>  | 4.3189<br>(0.8745) | 4.2943<br>(0.8761) | 4.2807<br>(0.8903) | 4.2682<br>(0.8803) | 4.2536<br>(0.8762) |
| <b>LC-BLYP*</b>                 | 4.0378<br>(0.8598) | 4.0197<br>(0.8612) | 4.0253<br>(0.8790) | 3.9965<br>(0.8572) | 3.9850<br>(0.8548) |
| <b><math>\omega</math>B97X*</b> | 4.0980<br>(0.8805) | 4.0782<br>(0.8820) | 4.0712<br>(0.8937) | 4.0557<br>(0.8811) | 4.0448<br>(0.8796) |

Table S8. Basis set effect on the gas phase vertical excitation energies (in eV) of **XIII** calculated using TD-DFT. Oscillator strengths are given in parentheses.

|                                 | <b>6-31+G*</b>     | <b>6-311+G*</b>    | <b>def2TZVP</b>    | <b>aug-cc-pVDZ</b> | <b>aug-cc-pVTZ</b> |
|---------------------------------|--------------------|--------------------|--------------------|--------------------|--------------------|
| <b>B3LYP</b>                    | 3.8052<br>(0.1986) | 3.7963<br>(0.1935) | 3.7881<br>(0.1871) | 3.7571<br>(0.1819) | 3.7628<br>(0.1813) |
| <b>BMK</b>                      | 4.0057<br>(0.2318) | 4.0047<br>(0.2261) | 3.9844<br>(0.2184) | 3.9586<br>(0.2107) | 3.9634<br>(0.2099) |
| <b>CAM-<br/>B3LYP</b>           | 4.0090<br>(0.2355) | 4.0024<br>(0.2288) | 3.9893<br>(0.2194) | 3.9557<br>(0.2133) | 3.9632<br>(0.2120) |
| <b>LC-BLYP</b>                  | 4.2255<br>(0.2744) | 4.2226<br>(0.2655) | 4.2041<br>(0.2530) | 4.1683<br>(0.2461) | 4.1773<br>(0.2442) |
| <b>M06</b>                      | 3.8400<br>(0.1985) | 3.8274<br>(0.1941) | 3.8182<br>(0.1920) | 3.7962<br>(0.1821) | 3.7868<br>(0.1826) |
| <b>M06-2X</b>                   | 4.0015<br>(0.2371) | 3.9993<br>(0.2302) | 3.9825<br>(0.2193) | 3.9457<br>(0.2144) | 3.9637<br>(0.2118) |
| <b>M11</b>                      | 4.0239<br>(0.2476) | 4.0232<br>(0.2433) | 4.0053<br>(0.2302) | 3.9681<br>(0.2230) | 3.9785<br>(0.2241) |
| <b>PBE0</b>                     | 3.8798<br>(0.2082) | 3.8717<br>(0.2026) | 3.8581<br>(0.1949) | 3.8289<br>(0.1890) | 3.8343<br>(0.1886) |
| <b><math>\omega</math>B97</b>   | 4.1662<br>(0.2646) | 4.1598<br>(0.2578) | 4.1409<br>(0.2469) | 4.1111<br>(0.2383) | 4.1156<br>(0.2373) |
| <b><math>\omega</math>B97X</b>  | 4.1098<br>(0.2540) | 4.1034<br>(0.2476) | 4.0842<br>(0.2373) | 4.0556<br>(0.2292) | 4.0597<br>(0.2285) |
| <b>LC-BLYP*</b>                 | 3.9265<br>(0.2327) | 3.9214<br>(0.2261) | 3.9072<br>(0.2160) | 3.8726<br>(0.2102) | 3.8791<br>(0.2088) |
| <b><math>\omega</math>B97X*</b> | 4.0193<br>(0.2390) | 4.0123<br>(0.2335) | 3.9940<br>(0.2243) | 3.9670<br>(0.2165) | 3.9699<br>(0.2162) |

Table S9. Basis set effect on the gas phase vertical excitation energies (in eV) of **XIX** calculated using TD-DFT. Oscillator strengths are given in parentheses.

|                                 | <b>6-31+G*</b>     | <b>6-311+G*</b>    | <b>def2TZVP</b>    | <b>aug-cc-pVDZ</b> | <b>aug-cc-pVTZ</b> |
|---------------------------------|--------------------|--------------------|--------------------|--------------------|--------------------|
| <b>B3LYP</b>                    | 3.6583<br>(0.3209) | 3.6331<br>(0.3157) | 3.6659<br>(0.3105) | 3.6449<br>(0.3133) | 3.6454<br>(0.3147) |
| <b>BMK</b>                      | 3.9800<br>(0.3961) | 3.9570<br>(0.3913) | 3.9799<br>(0.3833) | 3.9599<br>(0.3831) | 3.9576<br>(0.3860) |
| <b>CAM-<br/>B3LYP</b>           | 4.0017<br>(0.3963) | 3.9742<br>(0.3915) | 3.9952<br>(0.3786) | 3.9750<br>(0.3827) | 3.9723<br>(0.3828) |
| <b>LC-BLYP</b>                  | 4.2823<br>(0.4417) | 4.2508<br>(0.4369) | 4.2628<br>(0.4209) | 4.2436<br>(0.4243) | 4.2384<br>(0.4238) |
| <b>M06</b>                      | 3.7229<br>(0.3367) | 3.6989<br>(0.3328) | 3.7387<br>(0.3300) | 3.7120<br>(0.3290) | 3.7117<br>(0.3311) |
| <b>M06-2X</b>                   | 4.0241<br>(0.4067) | 3.9996<br>(0.4019) | 4.0225<br>(0.3910) | 3.9959<br>(0.3912) | 4.0015<br>(0.3936) |
| <b>M11</b>                      | 4.1495<br>(0.4245) | 4.1224<br>(0.4201) | 4.1467<br>(0.4107) | 4.1224<br>(0.4087) | 4.1236<br>(0.4095) |
| <b>PBE0</b>                     | 3.7642<br>(0.3440) | 3.7392<br>(0.3392) | 3.7680<br>(0.3322) | 3.7475<br>(0.3349) | 3.7488<br>(0.3360) |
| <b><math>\omega</math>B97</b>   | 4.2391<br>(0.4260) | 4.2101<br>(0.4225) | 4.2190<br>(0.4083) | 4.2041<br>(0.4103) | 4.1986<br>(0.4103) |
| <b><math>\omega</math>B97X</b>  | 4.1656<br>(0.4169) | 4.1380<br>(0.4131) | 4.1498<br>(0.3993) | 4.1335<br>(0.4020) | 4.1299<br>(0.4023) |
| <b>LC-BLYP*</b>                 | 3.9095<br>(0.3656) | 3.8837<br>(0.3616) | 3.9037<br>(0.3466) | 3.8812<br>(0.3524) | 3.8779<br>(0.3528) |
| <b><math>\omega</math>B97X*</b> | 4.0047<br>(0.3862) | 3.9800<br>(0.3829) | 3.9971<br>(0.3710) | 3.9791<br>(0.3735) | 3.9784<br>(0.3747) |

Table S10. Basis set effect on the gas phase vertical excitation energies (in eV) calculated using correlated wave function methods. Oscillator strengths are given in parentheses where available.

|             | CIS(D)    |            | CC2           |               | EOM-CCSD      |               |
|-------------|-----------|------------|---------------|---------------|---------------|---------------|
|             | 6-31+G(d) | 6-311+G(d) | 6-31+G(d)     | 6-311+G(d)    | 6-31+G(d)     | 6-311+G(d)    |
| <b>I</b>    | 3.82      | 3.77       | 3.59 (0.1384) | 3.54 (0.1309) | 3.90 (0.1682) | 3.85 (0.1610) |
| <b>VI</b>   | 4.65      | 4.60       | 4.46 (0.9718) | 4.41 (0.9740) | 4.67 (0.9082) | 4.62 (0.9202) |
| <b>IX</b>   | 3.79      | 3.75       | 3.76 (0.1217) | 3.71 (0.1155) | 3.97 (0.1304) | 3.94 (0.1252) |
| <b>XIII</b> | 3.84      | 3.83       | 3.83 (0.3205) | 3.82 (0.3137) | 4.02 (0.3237) | 4.01 (0.3156) |
| <b>XIX</b>  | 4.18      | 4.13       | 3.96 (0.4312) | 3.91 (0.4264) | 4.20 (0.4091) | 4.16 (0.4118) |

The basis set effect on the TD-DFT vertical excitation energies and oscillator strengths were then investigated using the test set. The results obtained using the 6-31+G(d),<sup>12-15</sup> 6-311+G(d),<sup>15, 16</sup> def2TZVP,<sup>17</sup> aug-cc-pVDZ basis sets<sup>18-20</sup> were compared to those using the aug-cc-pVTZ basis set.<sup>18-20</sup> The results are given in Tables S5 to S9. The aug-cc-pVDZ results were found to match the aug-cc-pVTZ results very closely, with their excitation energies and oscillator strengths within 0.02 eV and 0.01 of each other respectively. The def2TZVP results were slightly poorer, while the 6-31+G(d) and 6-311+G(d) basis sets returned excitation energies and oscillator strengths that were noticeable higher than the aug-cc-pVTZ values.



## 5. Effect of spectral HWHM on the calculated fluorescence lifetimes

Santoro and co-workers have proposed the use of PCM solvation in conjunction with the state-specific method as an *ab initio* approach towards calculating the solvent inhomogeneous broadening for an electronic transition.<sup>21, 22</sup> This is in turn used as the value of the half width at half-maximum (HWHM) of the Gaussian functions used to convolute the simulated vibronic spectra. However, the cited approach is known to underestimate the actual experimental width in the case of non-polar solvents. We have carried out the relevant calculations for the test set (**I**, **VI**, **IX**, **XIV**, **XIX**), and our findings agree with their work (Table S11). However, our set of experimental data consists of a mixture of polar and non-polar solvents. As it would not be desirable to only calculate the HWHM for molecules in polar solvents, we chose to keep the value of the HWHM constant throughout.

Table S11: The computed non-equilibrium and equilibrium vertical emission energy ( $\nu_{emi}$ ), solvation reorganisation energy for emission ( $\lambda$ ), and HWHM for the convoluting function used in simulating the emission spectra for the molecules in the test set. All values are in  $\text{cm}^{-1}$ . The calculations were carried out using PBE0/aug-cc-pVDZ and assuming a temperature of  $T = 298 \text{ K}$ . For further details of the use of the state-specific method to estimate the band width, refer to Ferrer *et al.*<sup>22</sup>

|             | Solvent      | $\nu_{emi}$ (non-eq.) | $\nu_{emi}$ (eq.) | $\lambda$ | HWHM     |
|-------------|--------------|-----------------------|-------------------|-----------|----------|
| <b>I</b>    | Cyclohexane  | 21560                 | 21560             | $\sim 0$  | $\sim 0$ |
| <b>VI</b>   | Cyclohexane  | 26510                 | 26510             | $\sim 0$  | $\sim 0$ |
| <b>IX</b>   | Ethanol      | 25380                 | 25300             | 80        | 220      |
| <b>XIII</b> | 1,4-dioxane  | 27520                 | 27520             | $\sim 0$  | $\sim 0$ |
| <b>XIX</b>  | Acetonitrile | 22160                 | 21700             | 450       | 510      |

We then investigated the effect of varying the HWHM on the calculated fluorescence lifetimes. The value of the HWHM of the convoluting Gaussian function only affects the

results obtained using Scheme C through the  $\frac{1}{\langle \tilde{\nu}_f^{-3} \rangle}$  term (see Table 1 in main paper).

Table S12 summarises the effect of varying the value of HWHM on the  $\frac{1}{\langle \tilde{\nu}_f^{-3} \rangle}$  term and resultant fluorescence lifetime.

Table S12: Effect of changing the HWHM (cm<sup>-1</sup>) of each band in the simulated vibronic spectra on  $\frac{1}{\langle \tilde{\nu}_f^{-3} \rangle}$  ( $\times 10^{-13}$ ) and fluorescence lifetime,  $\tau_f$  (ns) for the molecules in the test set, as calculated using the PBE0 functional.

| HWHM          | I                                              |          | VI                                             |          | IX                                             |          | XIII                                           |          | XIX                                            |          |
|---------------|------------------------------------------------|----------|------------------------------------------------|----------|------------------------------------------------|----------|------------------------------------------------|----------|------------------------------------------------|----------|
|               | $\frac{1}{\langle \tilde{\nu}_f^{-3} \rangle}$ | $\tau_f$ |
| 100           | 1.12                                           | 18.02    | 0.74                                           | 19.71    | 0.72                                           | 1.44     | 0.66                                           | 8.88     | 1.42                                           | 9.47     |
| 135 (Default) | 1.12                                           | 18.02    | 0.74                                           | 19.71    | 0.72                                           | 1.44     | 0.66                                           | 8.88     | 1.42                                           | 9.47     |
| 200           | 1.12                                           | 18.03    | 0.74                                           | 19.71    | 0.72                                           | 1.44     | 0.66                                           | 8.88     | 1.42                                           | 9.47     |
| 300           | 1.12                                           | 18.04    | 0.74                                           | 19.72    | 0.72                                           | 1.44     | 0.66                                           | 8.88     | 1.42                                           | 9.48     |
| 400           | 1.12                                           | 18.05    | 0.74                                           | 19.73    | 0.72                                           | 1.44     | 0.66                                           | 8.89     | 1.43                                           | 9.49     |
| 500           | 1.12                                           | 18.08    | 0.74                                           | 19.76    | 0.72                                           | 1.45     | 0.66                                           | 8.90     | 1.43                                           | 9.50     |
| 600           | 1.12                                           | 18.14    | 0.74                                           | 19.81    | 0.72                                           | 1.45     | 0.66                                           | 8.91     | 1.43                                           | 9.52     |
| 700           | 1.13                                           | 18.23    | 0.75                                           | 19.87    | 0.73                                           | 1.45     | 0.66                                           | 8.94     | 1.44                                           | 9.55     |
| 800           | 1.14                                           | 18.33    | 0.75                                           | 19.96    | 0.73                                           | 1.46     | 0.67                                           | 8.97     | 1.44                                           | 9.59     |
| 900           | 1.14                                           | 18.46    | 0.75                                           | 20.06    | 0.73                                           | 1.46     | 0.67                                           | 9.01     | 1.45                                           | 9.63     |
| 1000          | 1.15                                           | 18.60    | 0.76                                           | 20.17    | 0.73                                           | 1.47     | 0.67                                           | 9.06     | 1.46                                           | 9.68     |

## 6. Charge-transfer diagnostics for VI

The charge-transfer criteria suggested by Autschbach and co-workers have been evaluated for the  $\pi$ - $\pi^*$  electronic transition of VI (Table S13).<sup>23, 24</sup>

$O_{\pi\pi^*} = \langle \phi_{\pi}(r) | \phi_{\pi^*}(r) \rangle = \int |\phi_{\pi}(r)\phi_{\pi^*}(r)| dr$  refers to the spatial overlap integral between the

transition orbitals, and  $\frac{1}{2}\langle |\Delta\rho| \rangle$  measures the extent of charge transfer between “spatially

disjointed” regions with  $|\Delta\rho| = |\phi_{\pi}^2 - \phi_{\pi^*}^2|$ . Single point calculations for VI in the gas phase

with two sets of functionals (BLYP and LC-BLYP\*) were carried out and the resultant .fchk files saved for the following evaluation of the charge-transfer criteria. The cubegen and

cubeman utilities of Gaussian09 were used in conjunction with the bash command (“sed -i

's/\([0-9]\.[0-9]\+\)E/\1E/g”) to obtain .cube files corresponding to  $|\phi_{HOMO}| |\phi_{LUMO}|$  and

$|\Delta\rho|$ , while numerical integration over grid points were performed with Gabedit.<sup>25</sup> The

default “Medium” option was used as the parameters for the grid used to generate the .cube

files in cubegen. Using this set of parameters, the integral of the SCF density of VI was found

to be 101.8, close to the actual number of electrons in VI (102). The values of the calculated

charge-transfer criteria is given in Table S12.

Table S13: CT criteria for the  $\pi$ - $\pi^*$  transition of VI, and  $\frac{1}{2}\langle |\Delta\rho| \rangle$  were found to  $\sim 0.7$  and  $\sim 0.6$  respectively for the rhodamines studied in *ChemistryOpen*, 2017, **6**, 385-392. The calculations were carried out in the gas phase.

|                 | $O$  | $\frac{1}{2}\langle  \Delta\rho  \rangle$ |
|-----------------|------|-------------------------------------------|
| <b>BLYP</b>     | 0.72 | 0.55                                      |
| <b>LC-BLYP*</b> | 0.71 | 0.57                                      |

Moore II *et al.*<sup>23, 24</sup> have suggested that large values for both the overlap integral

$O$  as well as the density change criteria  $\frac{1}{2}\langle |\Delta\rho| \rangle$  may indicate differential electron correlation between the ground and excited state. In their study of the electronic excitations of

rhodamines, the values of  $O$  and  $\frac{1}{2}\langle|\Delta\rho|\rangle$  were found to  $\sim 0.7$  and  $\sim 0.6$  respectively, which is similar to what we observed for **VI**. As a result, the problem in the results for acridones can similarly be attributed to differential electron correlation between the ground and excited state being treated poorly by TD-DFT.

## 7. Fluorescence lifetime calculations for all functionals and molecules investigated

Table S14: Vertical energies (in  $\text{cm}^{-1}$ ) and oscillator strengths for the calculation of fluorescence lifetimes using Scheme A. The results were obtained at the ground state optimised geometries in solvent using the state-specific solvation method.

|             | <b>B3LYP</b>      | <b>BMK</b>        | <b>CAM-B3LYP</b>  | <b>LC-BLYP</b>    | <b>M06</b>        | <b>M06-2X</b>     | <b>M11</b>        | <b>PBE0</b>       | <b><math>\omega</math>B97</b> | <b><math>\omega</math>B97X</b> | <b>LC-BLYP*</b>   | <b><math>\omega</math>B97X*</b> |
|-------------|-------------------|-------------------|-------------------|-------------------|-------------------|-------------------|-------------------|-------------------|-------------------------------|--------------------------------|-------------------|---------------------------------|
| <b>I</b>    | 23974<br>(0.0862) | 26432<br>(0.1071) | 27026<br>(0.1198) | 30832<br>(0.1774) | 24033<br>(0.0917) | 27244<br>(0.1130) | 28740<br>(0.1374) | 24722<br>(0.0919) | 29389<br>(0.1448)             | 28581<br>(0.1387)              | 25922<br>(0.1123) | 26381<br>(0.1167)               |
| <b>II</b>   | 21723<br>(0.1129) | 24251<br>(0.1404) | 24832<br>(0.1587) | 28218<br>(0.2037) | 21899<br>(0.1208) | 25173<br>(0.1499) | 26650<br>(0.1823) | 22472<br>(0.1210) | 27345<br>(0.1950)             | 26459<br>(0.1851)              | 23504<br>(0.1459) | 24013<br>(0.1516)               |
| <b>III</b>  | 22256<br>(0.3247) | 24637<br>(0.3791) | 25363<br>(0.3927) | 28672<br>(0.4495) | 22324<br>(0.3296) | 25445<br>(0.3850) | 27324<br>(0.4260) | 23008<br>(0.3399) | 28018<br>(0.4427)             | 27211<br>(0.4307)              | 24197<br>(0.3595) | 24789<br>(0.3809)               |
| <b>IV</b>   | 22614<br>(0.3424) | 25179<br>(0.4031) | 25813<br>(0.4158) | 29295<br>(0.4808) | 22797<br>(0.3546) | 26006<br>(0.4103) | 27770<br>(0.4510) | 23343<br>(0.3587) | 28447<br>(0.4655)             | 27617<br>(0.4527)              | 24669<br>(0.3798) | 25160<br>(0.3991)               |
| <b>V</b>    | 24609<br>(0.1311) | 26800<br>(0.1836) | 27656<br>(0.1871) | 30815<br>(0.2396) | 24412<br>(0.1485) | 27646<br>(0.1875) | 29124<br>(0.2362) | 25250<br>(0.1460) | 29929<br>(0.2344)             | 29182<br>(0.2218)              | 25228<br>(0.1748) | 26274<br>(0.1677)               |
| <b>VI</b>   | 26770<br>(0.0722) | 29400<br>(0.0944) | 29930<br>(0.1045) | 32983<br>(0.1347) | 27665<br>(0.0756) | 29898<br>(0.1023) | 31041<br>(0.1193) | 27731<br>(0.0780) | 32086<br>(0.1256)             | 31430<br>(0.1196)              | 29177<br>(0.1128) | 29999<br>(0.1162)               |
| <b>VII</b>  | 26057<br>(0.0827) | 28605<br>(0.1058) | 29169<br>(0.1181) | 32185<br>(0.1514) | 26943<br>(0.0862) | 29047<br>(0.1152) | 30134<br>(0.1348) | 26977<br>(0.0888) | 31296<br>(0.1404)             | 30652<br>(0.1339)              | 27481<br>(0.1068) | 28416<br>(0.1101)               |
| <b>VIII</b> | 26592<br>(0.1009) | 29229<br>(0.1314) | 29783<br>(0.1464) | 32840<br>(0.1887) | 27478<br>(0.1060) | 29695<br>(0.1429) | 30773<br>(0.1676) | 27556<br>(0.1088) | 31928<br>(0.1758)             | 31291<br>(0.1674)              | 27600<br>(0.1254) | 28677<br>(0.1321)               |

|             | <b>B3LYP</b>      | <b>BMK</b>        | <b>CAM-<br/>B3LYP</b> | <b>LC-BLYP</b>    | <b>M06</b>        | <b>M06-2X</b>     | <b>M11</b>        | <b>PBE0</b>       | <b><math>\omega</math>B97</b> | <b><math>\omega</math>B97X</b> | <b>LC-<br/>BLYP*</b> | <b><math>\omega</math>B97X*</b> |
|-------------|-------------------|-------------------|-----------------------|-------------------|-------------------|-------------------|-------------------|-------------------|-------------------------------|--------------------------------|----------------------|---------------------------------|
| <b>IX</b>   | 29659<br>(0.7983) | 32998<br>(0.8887) | 33676<br>(0.8557)     | 37210<br>(0.8426) | 30038<br>(0.7856) | 33957<br>(0.8693) | 35833<br>(0.8739) | 30784<br>(0.8321) | 36349<br>(0.8489)             | 35659<br>(0.8615)              | 32400<br>(0.8340)    | 33136<br>(0.8630)               |
| <b>X</b>    | 27241<br>(1.8994) | 30127<br>(1.9951) | 31296<br>(1.9309)     | 34855<br>(1.8462) | 27629<br>(1.7950) | 31579<br>(2.0016) | 33642<br>(2.0034) | 28196<br>(1.9493) | 34044<br>(1.8627)             | 33290<br>(1.9026)              | 29576<br>(1.9429)    | 30296<br>(1.9550)               |
| <b>XI</b>   | 34280<br>(0.9074) | 37109<br>(1.0009) | 38169<br>(0.9497)     | 41038<br>(0.9049) | 33926<br>(0.8246) | 38241<br>(0.9995) | 39694<br>(0.9685) | 35351<br>(0.9340) | 40491<br>(0.9295)             | 40089<br>(0.9513)              | 36606<br>(0.9721)    | 38117<br>(0.9612)               |
| <b>XII</b>  | 31693<br>(1.2896) | 35052<br>(1.5185) | 36420<br>(1.4811)     | 39569<br>(1.4468) | 31723<br>(1.2646) | 36251<br>(1.5209) | 37909<br>(1.5031) | 32963<br>(1.3766) | 38970<br>(1.4780)             | 38536<br>(1.5011)              | 34175<br>(1.4746)    | 36002<br>(1.4861)               |
| <b>XIII</b> | 29334<br>(0.1586) | 31036<br>(0.1811) | 31694<br>(0.1882)     | 33940<br>(0.2209) | 30480<br>(0.1621) | 31982<br>(0.1927) | 30802<br>(0.2028) | 29993<br>(0.1690) | 34251<br>(0.2082)             | 33429<br>(0.2016)              | 30774<br>(0.1845)    | 32294<br>(0.1898)               |
| <b>XIV</b>  | 29724<br>(0.1371) | 31677<br>(0.1589) | 32364<br>(0.1672)     | 34675<br>(0.2005) | 31301<br>(0.1414) | 32777<br>(0.1733) | 31542<br>(0.1835) | 30488<br>(0.1469) | 34887<br>(0.1905)             | 34078<br>(0.1828)              | 31064<br>(0.1599)    | 32477<br>(0.1664)               |
| <b>XV</b>   | 28952<br>(0.0877) | 31365<br>(0.1037) | 31876<br>(0.1145)     | 34643<br>(0.1453) | 30352<br>(0.0892) | 32683<br>(0.1177) | 31662<br>(0.1273) | 29780<br>(0.0938) | 34598<br>(0.1367)             | 33660<br>(0.1283)              | 30410<br>(0.1071)    | 31980<br>(0.1136)               |
| <b>XVI</b>  | 27244<br>(0.1403) | 27244<br>(0.1742) | 27244<br>(0.1857)     | 27244<br>(0.2360) | 27244<br>(0.1494) | 27244<br>(0.1891) | 27244<br>(0.2065) | 27244<br>(0.1518) | 27244<br>(0.2203)             | 27244<br>(0.2085)              | 27244<br>(0.1622)    | 27244<br>(0.1769)               |

|              | <b>B3LYP</b>      | <b>BMK</b>        | <b>CAM-<br/>B3LYP</b> | <b>LC-<br/>BLYP</b> | <b>M06</b>        | <b>M06-2X</b>     | <b>M11</b>        | <b>PBE0</b>       | <b><math>\omega</math>B97</b> | <b><math>\omega</math>B97X</b> | <b>LC-<br/>BLYP*</b> | <b><math>\omega</math>B97X*</b> |
|--------------|-------------------|-------------------|-----------------------|---------------------|-------------------|-------------------|-------------------|-------------------|-------------------------------|--------------------------------|----------------------|---------------------------------|
| <b>XVII</b>  | 28329<br>(0.1347) | 28329<br>(0.1594) | 28329<br>(0.1692)     | 28329<br>(0.2079)   | 28329<br>(0.1401) | 28329<br>(0.1761) | 28329<br>(0.1879) | 28329<br>(0.1455) | 28329<br>(0.1982)             | 28329<br>(0.1878)              | 28329<br>(0.1512)    | 28329<br>(0.1631)               |
| <b>XVIII</b> | 32012<br>(0.1274) | 35254<br>(0.1456) | 35332<br>(0.1570)     | 38768<br>(0.1880)   | 33769<br>(0.1240) | 36036<br>(0.1473) | 35677<br>(0.1680) | 33128<br>(0.1372) | 38087<br>(0.1700)             | 37120<br>(0.1667)              | 33161<br>(0.1426)    | 34779<br>(0.1486)               |
| <b>XIX</b>   | 25204<br>(0.2978) | 28488<br>(0.3852) | 29049<br>(0.3940)     | 32480<br>(0.4620)   | 26557<br>(0.3276) | 29412<br>(0.4033) | 30469<br>(0.4367) | 26453<br>(0.3262) | 31995<br>(0.4309)             | 31180<br>(0.4222)              | 27832<br>(0.3694)    | 29155<br>(0.3838)               |
| <b>XX</b>    | 26746<br>(0.3846) | 29709<br>(0.4690) | 30484<br>(0.4717)     | 33609<br>(0.5282)   | 28166<br>(0.3990) | 30587<br>(0.4766) | 31626<br>(0.5036) | 27829<br>(0.4116) | 33209<br>(0.4944)             | 32487<br>(0.4896)              | 28917<br>(0.4293)    | 30169<br>(0.4483)               |
| <b>XXI</b>   | 25913<br>(0.3833) | 29164<br>(0.4849) | 30168<br>(0.5067)     | 33541<br>(0.5712)   | 27511<br>(0.4080) | 29996<br>(0.5123) | 31302<br>(0.5299) | 27112<br>(0.4119) | 32832<br>(0.5452)             | 31993<br>(0.5340)              | 28349<br>(0.4408)    | 29321<br>(0.4725)               |
| <b>XXII</b>  | 24293<br>(0.3508) | 27624<br>(0.4621) | 28402<br>(0.4770)     | 32120<br>(0.5650)   | 25778<br>(0.3875) | 28428<br>(0.4908) | 29972<br>(0.5332) | 25540<br>(0.3825) | 31155<br>(0.5367)             | 30462<br>(0.5208)              | 26726<br>(0.4220)    | 27688<br>(0.4480)               |
| <b>XXIII</b> | 24504<br>(0.3380) | 27670<br>(0.4266) | 28582<br>(0.4385)     | 32174<br>(0.4901)   | 25947<br>(0.3499) | 28623<br>(0.4379) | 30012<br>(0.4556) | 25585<br>(0.3632) | 31580<br>(0.4692)             | 30781<br>(0.4640)              | 26491<br>(0.3807)    | 27705<br>(0.4127)               |
| <b>XXIV</b>  | 24665<br>(0.5212) | 27515<br>(0.6323) | 28439<br>(0.6474)     | 31874<br>(0.7376)   | 25936<br>(0.5421) | 28308<br>(0.6529) | 29749<br>(0.6920) | 25703<br>(0.5554) | 31006<br>(0.7044)             | 30306<br>(0.6888)              | 26257<br>(0.5625)    | 27569<br>(0.6088)               |

Table S15: Fluorescence lifetimes (in ns) of all molecules investigated in this study calculated using Scheme A. All results are in solvent

|             | <b>B3LYP</b> | <b>BMK</b> | <b>CAM-B3LYP</b> | <b>LC-BLYP</b> | <b>M06</b> | <b>M06-2X</b> | <b>M11</b> | <b>PBE0</b> | <b><math>\omega</math>B97</b> | <b><math>\omega</math>B97X</b> | <b>LC-BLYP*</b> | <b><math>\omega</math>B97X*</b> |
|-------------|--------------|------------|------------------|----------------|------------|---------------|------------|-------------|-------------------------------|--------------------------------|-----------------|---------------------------------|
| <b>I</b>    | 13.77        | 9.12       | 7.80             | 4.05           | 12.87      | 8.13          | 6.01       | 12.15       | 5.45                          | 6.02                           | 9.04            | 8.40                            |
| <b>II</b>   | 12.23        | 7.87       | 6.64             | 3.99           | 11.23      | 6.83          | 5.01       | 10.65       | 4.44                          | 5.01                           | 8.07            | 7.44                            |
| <b>III</b>  | 5.04         | 3.52       | 3.21             | 2.19           | 4.93       | 3.25          | 2.54       | 4.50        | 2.33                          | 2.54                           | 3.85            | 3.46                            |
| <b>IV</b>   | 4.11         | 2.82       | 2.60             | 1.74           | 3.91       | 2.59          | 2.07       | 3.68        | 1.91                          | 2.08                           | 3.11            | 2.85                            |
| <b>V</b>    | 9.32         | 5.61       | 5.17             | 3.25           | 8.36       | 5.16          | 3.69       | 7.95        | 3.52                          | 3.92                           | 6.65            | 6.39                            |
| <b>VI</b>   | 15.53        | 9.84       | 8.58             | 5.48           | 13.89      | 8.78          | 6.98       | 13.38       | 6.20                          | 6.79                           | 8.46            | 7.77                            |
| <b>VII</b>  | 14.53        | 9.42       | 8.12             | 5.19           | 13.04      | 8.39          | 6.66       | 12.62       | 5.92                          | 6.48                           | 10.10           | 9.17                            |
| <b>VIII</b> | 11.50        | 7.30       | 6.32             | 4.02           | 10.25      | 6.50          | 5.16       | 9.92        | 4.57                          | 5.00                           | 8.58            | 7.54                            |
| <b>IX</b>   | 1.00         | 0.72       | 0.72             | 0.60           | 0.98       | 0.69          | 0.62       | 0.89        | 0.62                          | 0.64                           | 0.80            | 0.73                            |
| <b>X</b>    | 0.47         | 0.37       | 0.35             | 0.30           | 0.49       | 0.33          | 0.29       | 0.43        | 0.31                          | 0.32                           | 0.39            | 0.37                            |
| <b>XI</b>   | 0.67         | 0.52       | 0.52             | 0.47           | 0.76       | 0.49          | 0.47       | 0.62        | 0.47                          | 0.47                           | 0.55            | 0.52                            |
| <b>XII</b>  | 0.47         | 0.32       | 0.31             | 0.27           | 0.48       | 0.30          | 0.28       | 0.41        | 0.27                          | 0.27                           | 0.35            | 0.31                            |



|              | <b>B3LYP</b> | <b>BMK</b> | <b>CAM-B3LYP</b> | <b>LC-BLYP</b> | <b>M06</b> | <b>M06-2X</b> | <b>M11</b> | <b>PBE0</b> | <b><math>\omega</math>B97</b> | <b><math>\omega</math>B97X</b> | <b>LC-BLYP*</b> | <b><math>\omega</math>B97X*</b> |
|--------------|--------------|------------|------------------|----------------|------------|---------------|------------|-------------|-------------------------------|--------------------------------|-----------------|---------------------------------|
| <b>XIII</b>  | 5.06         | 3.96       | 3.64             | 2.71           | 4.57       | 3.49          | 3.59       | 4.53        | 2.81                          | 3.05                           | 3.94            | 3.47                            |
| <b>XIV</b>   | 6.01         | 4.57       | 4.15             | 3.01           | 5.23       | 3.90          | 3.99       | 5.32        | 3.13                          | 3.41                           | 4.71            | 4.13                            |
| <b>XV</b>    | 10.22        | 7.37       | 6.45             | 4.31           | 9.12       | 5.97          | 5.89       | 9.03        | 4.58                          | 5.16                           | 7.59            | 6.46                            |
| <b>XVI</b>   | 7.22         | 4.87       | 4.36             | 2.88           | 6.18       | 4.10          | 4.07       | 6.33        | 3.06                          | 3.42                           | 5.67            | 4.65                            |
| <b>XVII</b>  | 6.28         | 4.62       | 4.11             | 2.83           | 5.50       | 3.79          | 3.86       | 5.51        | 2.93                          | 3.28                           | 5.18            | 4.32                            |
| <b>XVIII</b> | 4.45         | 3.21       | 2.96             | 2.06           | 4.09       | 3.03          | 2.72       | 3.86        | 2.35                          | 2.53                           | 3.70            | 3.23                            |
| <b>XIX</b>   | 4.34         | 2.60       | 2.43             | 1.64           | 3.52       | 2.31          | 1.99       | 3.58        | 1.81                          | 1.95                           | 2.83            | 2.47                            |
| <b>XX</b>    | 2.56         | 1.68       | 1.58             | 1.15           | 2.19       | 1.55          | 1.37       | 2.20        | 1.25                          | 1.33                           | 1.93            | 1.69                            |
| <b>XXI</b>   | 3.25         | 2.00       | 1.78             | 1.26           | 2.67       | 1.78          | 1.57       | 2.75        | 1.38                          | 1.49                           | 2.32            | 2.02                            |
| <b>XXII</b>  | 3.74         | 2.18       | 1.99             | 1.31           | 2.99       | 1.94          | 1.60       | 3.10        | 1.46                          | 1.58                           | 2.55            | 2.23                            |
| <b>XXIII</b> | 3.97         | 2.44       | 2.20             | 1.54           | 3.36       | 2.20          | 1.91       | 3.37        | 1.66                          | 1.78                           | 2.97            | 2.50                            |
| <b>XXIV</b>  | 1.97         | 1.30       | 1.18             | 0.82           | 1.71       | 1.19          | 1.01       | 1.70        | 0.91                          | 0.98                           | 1.60            | 1.34                            |

Table S16: Vertical energies (in  $\text{cm}^{-1}$ ) and oscillator strengths for the calculation of fluorescence lifetimes using Schemes B and C. The results were obtained at the excited state optimised geometries in solvent using the state-specific solvation method.

|             | <b>B3LYP</b>      | <b>BMK</b>        | <b>CAM-B3LYP</b>  | <b>LC-BLYP</b>    | <b>M06</b>        | <b>M06-2X</b>     | <b>M11</b>        | <b>PBE0</b>       | <b><math>\omega</math>B97</b> | <b><math>\omega</math>B97X</b> | <b>LC-BLYP*</b>   | <b><math>\omega</math>B97X*</b> |
|-------------|-------------------|-------------------|-------------------|-------------------|-------------------|-------------------|-------------------|-------------------|-------------------------------|--------------------------------|-------------------|---------------------------------|
| <b>I</b>    | 20950<br>(0.0856) | 22539<br>(0.1061) | 22891<br>(0.1189) | 25157<br>(0.1764) | 20851<br>(0.0909) | 23011<br>(0.1112) | 23959<br>(0.1348) | 21557<br>(0.0910) | 23990<br>(0.1440)             | 23706<br>(0.1374)              | 22386<br>(0.1110) | 22571<br>(0.1156)               |
| <b>II</b>   | 18943<br>(0.1086) | 20651<br>(0.1359) | 20980<br>(0.1542) | 22736<br>(0.1972) | 18963<br>(0.1167) | 21244<br>(0.1446) | 22158<br>(0.1758) | 19556<br>(0.1165) | 22226<br>(0.1892)             | 21880<br>(0.1800)              | 20291<br>(0.1417) | 20521<br>(0.1474)               |
| <b>III</b>  | 19440<br>(0.3224) | 20876<br>(0.3777) | 21182<br>(0.3923) | 22836<br>(0.4539) | 19332<br>(0.3286) | 21309<br>(0.3826) | 22426<br>(0.4247) | 20049<br>(0.3377) | 22493<br>(0.4456)             | 22159<br>(0.4312)              | 20585<br>(0.3569) | 20908<br>(0.3797)               |
| <b>IV</b>   | 19858<br>(0.3414) | 21410<br>(0.4032) | 21687<br>(0.4167) | 23479<br>(0.4847) | 19848<br>(0.3542) | 21863<br>(0.4101) | 22912<br>(0.4520) | 20439<br>(0.3576) | 22978<br>(0.4697)             | 22646<br>(0.4546)              | 21087<br>(0.3793) | 21325<br>(0.3999)               |
| <b>V</b>    | 20516<br>(0.1877) | 21984<br>(0.2280) | 22505<br>(0.2308) | 24119<br>(0.2733) | 20277<br>(0.1993) | 22355<br>(0.2369) | 23414<br>(0.2705) | 20971<br>(0.2057) | 23534<br>(0.2735)             | 23326<br>(0.2590)              | 21132<br>(0.2188) | 21728<br>(0.2147)               |
| <b>VI</b>   | 24372<br>(0.0710) | 26732<br>(0.0943) | 27275<br>(0.1054) | 29938<br>(0.1388) | 25165<br>(0.0750) | 27230<br>(0.1035) | 28350<br>(0.1215) | 25297<br>(0.0773) | 29191<br>(0.1296)             | 28670<br>(0.1225)              | 26815<br>(0.1137) | 27446<br>(0.1169)               |
| <b>VII</b>  | 23446<br>(0.0777) | 25865<br>(0.1021) | 26453<br>(0.1151) | 29292<br>(0.1529) | 24318<br>(0.0818) | 26299<br>(0.1127) | 27411<br>(0.1331) | 24330<br>(0.0842) | 28470<br>(0.1416)             | 27896<br>(0.1337)              | 24911<br>(0.1026) | 25709<br>(0.1063)               |
| <b>VIII</b> | 24292<br>(0.0973) | 26719<br>(0.1289) | 27293<br>(0.1449) | 30033<br>(0.1906) | 25105<br>(0.1029) | 27194<br>(0.1417) | 28273<br>(0.1675) | 25219<br>(0.1056) | 29264<br>(0.1778)             | 28740<br>(0.1684)              | 25430<br>(0.1230) | 26333<br>(0.1300)               |

|             | <b>B3LYP</b>      | <b>BMK</b>        | <b>CAM-<br/>B3LYP</b> | <b>LC-BLYP</b>    | <b>M06</b>        | <b>M06-2X</b>     | <b>M11</b>        | <b>PBE0</b>       | <b>ωB97</b>       | <b>ωB97X</b>      | <b>LC-<br/>BLYP*</b> | <b>ωB97X*</b>     |
|-------------|-------------------|-------------------|-----------------------|-------------------|-------------------|-------------------|-------------------|-------------------|-------------------|-------------------|----------------------|-------------------|
| <b>IX</b>   | 25692<br>(0.8993) | 27487<br>(0.9665) | 27445<br>(0.9205)     | 29303<br>(0.9117) | 25621<br>(0.8708) | 27820<br>(0.9356) | 28937<br>(0.9258) | 26509<br>(0.9226) | 28699<br>(0.9106) | 28391<br>(0.9189) | 26912<br>(0.8791)    | 27175<br>(0.9201) |
| <b>X</b>    | 24172<br>(2.0368) | 26019<br>(2.0944) | 26707<br>(2.0118)     | 29186<br>(1.9134) | 24260<br>(1.9082) | 27049<br>(2.0749) | 28576<br>(2.0386) | 24921<br>(2.0738) | 28580<br>(1.9269) | 28094<br>(1.9627) | 25721<br>(2.0035)    | 25718<br>(2.0247) |
| <b>XI</b>   | 26859<br>(1.1282) | 28500<br>(1.1802) | 28646<br>(1.1317)     | 30278<br>(1.0997) | 26575<br>(1.0495) | 29027<br>(1.1544) | 30151<br>(1.1268) | 27705<br>(1.1534) | 29882<br>(1.1146) | 29669<br>(1.1268) | 28240<br>(1.0982)    | 28537<br>(1.1440) |
| <b>XII</b>  | 24741<br>(1.6331) | 26657<br>(1.7145) | 27205<br>(1.6449)     | 29194<br>(1.5809) | 24664<br>(1.5485) | 27397<br>(1.6694) | 28959<br>(1.6144) | 25650<br>(1.6711) | 28804<br>(1.6000) | 28558<br>(1.6206) | 26466<br>(1.6032)    | 27060<br>(1.6567) |
| <b>XIII</b> | 26640<br>(0.1293) | 28113<br>(0.1527) | 28636<br>(0.1662)     | 30508<br>(0.2047) | 27372<br>(0.1379) | 28559<br>(0.1745) | 28794<br>(0.1829) | 27517<br>(0.1414) | 29883<br>(0.1993) | 29550<br>(0.1880) | 28068<br>(0.1644)    | 28760<br>(0.1722) |
| <b>XIV</b>  | 26806<br>(0.1037) | 28510<br>(0.1260) | 29095<br>(0.1374)     | 31348<br>(0.1755) | 27757<br>(0.1122) | 28993<br>(0.1475) | 29279<br>(0.1555) | 27722<br>(0.1146) | 30633<br>(0.1719) | 30199<br>(0.1596) | 28076<br>(0.1291)    | 28902<br>(0.1377) |
| <b>XV</b>   | 22578<br>(0.0615) | 24071<br>(0.0756) | 25018<br>(0.0839)     | 27487<br>(0.1145) | 23573<br>(0.0663) | 24896<br>(0.0889) | 25150<br>(0.0943) | 23253<br>(0.0666) | 26561<br>(0.1076) | 26060<br>(0.0976) | 23735<br>(0.0745)    | 24698<br>(0.0822) |
| <b>XVI</b>  | 22530<br>(0.1099) | 24709<br>(0.1390) | 25328<br>(0.1484)     | 28085<br>(0.1967) | 23338<br>(0.1224) | 25091<br>(0.1541) | 25643<br>(0.1640) | 23281<br>(0.1191) | 27224<br>(0.1845) | 26634<br>(0.1707) | 23614<br>(0.1231)    | 24734<br>(0.1390) |
|             | <b>B3LYP</b>      | <b>BMK</b>        | <b>CAM-</b>           | <b>LC-</b>        | <b>M06</b>        | <b>M06-2X</b>     | <b>M11</b>        | <b>PBE0</b>       | <b>ωB97</b>       | <b>ωB97X</b>      | <b>LC-</b>           | <b>ωB97X*</b>     |

|              |          |          | <b>B3LYP</b> | <b>BLYP</b> |          |          |          |          |          |          | <b>BLYP*</b> |          |
|--------------|----------|----------|--------------|-------------|----------|----------|----------|----------|----------|----------|--------------|----------|
| <b>XVII</b>  | 23415    | 25393    | 25760        | 28012       | 24435    | 25620    | 25985    | 24206    | 27397    | 26897    | 24174        | 25296    |
|              | (0.1054) | (0.1229) | (0.1368)     | (0.1746)    | (0.1104) | (0.1447) | (0.1501) | (0.1150) | (0.1683) | (0.1558) | (0.1153)     | (0.1295) |
| <b>XVIII</b> | 24499    | 25582    | 26399        | 28215       | 25254    | 26223    | 26108    | 24889    | 27734    | 27359    | 25066        | 26110    |
|              | (0.1417) | (0.1675) | (0.1775)     | (0.2160)    | (0.1481) | (0.1826) | (0.1907) | (0.1541) | (0.2053) | (0.1949) | (0.1560)     | (0.1687) |
| <b>XIX</b>   | 20126    | 23992    | 24218        | 25850       | 22065    | 24473    | 24961    | 21705    | 25283    | 25210    | 23223        | 24056    |
|              | (0.2346) | (0.3776) | (0.4019)     | (0.4907)    | (0.2926) | (0.4115) | (0.4496) | (0.2794) | (0.4629) | (0.4472) | (0.3689)     | (0.3920) |
| <b>XX</b>    | 23816    | 26774    | 27071        | 28432       | 25439    | 26786    | 27323    | 25020    | 27859    | 27815    | 25771        | 26609    |
|              | (0.3843) | (0.4981) | (0.5096)     | (0.5723)    | (0.4191) | (0.5133) | (0.5412) | (0.4213) | (0.5481) | (0.5374) | (0.4598)     | (0.4863) |
| <b>XXI</b>   | 22539    | 26480    | 27122        | 28743       | 25022    | 26656    | 27428    | 23979    | 28125    | 28045    | 25661        | 26525    |
|              | (0.3466) | (0.5172) | (0.5450)     | (0.6219)    | (0.4154) | (0.5481) | (0.5797) | (0.3958) | (0.5964) | (0.5827) | (0.4772)     | (0.5118) |
| <b>XXII</b>  | 20701    | 24991    | 25637        | 27534       | 22564    | 25779    | 26522    | 22390    | 26899    | 26782    | 24147        | 25011    |
|              | (0.2548) | (0.4318) | (0.4676)     | (0.5718)    | (0.3148) | (0.4829) | (0.5323) | (0.3039) | (0.5408) | (0.5238) | (0.4011)     | (0.4329) |
| <b>XXIII</b> | 21128    | 24566    | 25232        | 26891       | 22892    | 24901    | 25579    | 22345    | 26388    | 26235    | 23360        | 24412    |
|              | (0.3086) | (0.4614) | (0.4947)     | (0.5818)    | (0.3581) | (0.4949) | (0.5320) | (0.3503) | (0.5592) | (0.5428) | (0.4148)     | (0.4553) |
| <b>XXIV</b>  | 22708    | 24880    | 25157        | 26345       | 23795    | 25024    | 25433    | 23655    | 25821    | 25755    | 23651        | 24568    |
|              | (0.5003) | (0.6364) | (0.6486)     | (0.7105)    | (0.5424) | (0.6517) | (0.6755) | (0.5450) | (0.6817) | (0.6732) | (0.5595)     | (0.6088) |

Table S17: Fluorescence lifetimes (in ns) of all molecules investigated in this study calculated using Scheme B. All results are in solvent

---

|             | <b>B3LYP</b> | <b>BMK</b> | <b>CAM-B3LYP</b> | <b>LC-BLYP</b> | <b>M06</b> | <b>M06-2X</b> | <b>M11</b> | <b>PBE0</b> | <b><math>\omega</math>B97</b> | <b><math>\omega</math>B97X</b> | <b>LC-BLYP*</b> | <b><math>\omega</math>B97X*</b> |
|-------------|--------------|------------|------------------|----------------|------------|---------------|------------|-------------|-------------------------------|--------------------------------|-----------------|---------------------------------|
| <b>I</b>    | 18.15        | 12.65      | 10.94            | 6.11           | 17.24      | 11.58         | 8.81       | 16.12       | 8.22                          | 8.83                           | 12.26           | 11.58                           |
| <b>II</b>   | 16.74        | 11.23      | 9.58             | 6.36           | 15.52      | 9.96          | 7.52       | 14.63       | 6.94                          | 7.53                           | 11.16           | 10.48                           |
| <b>III</b>  | 6.65         | 4.92       | 4.61             | 3.43           | 6.60       | 4.67          | 3.79       | 5.97        | 3.60                          | 3.83                           | 5.36            | 4.88                            |
| <b>IV</b>   | 5.35         | 3.89       | 3.67             | 2.69           | 5.16       | 3.67          | 3.03       | 4.82        | 2.90                          | 3.09                           | 4.27            | 3.96                            |
| <b>V</b>    | 9.37         | 6.72       | 6.33             | 4.65           | 9.03       | 6.25          | 4.98       | 8.18        | 4.89                          | 5.25                           | 7.57            | 7.30                            |
| <b>VI</b>   | 19.30        | 12.07      | 10.39            | 6.54           | 17.16      | 10.60         | 8.33       | 16.44       | 7.36                          | 8.08                           | 10.05           | 9.36                            |
| <b>VII</b>  | 19.43        | 12.14      | 10.30            | 6.30           | 17.18      | 10.64         | 8.28       | 16.64       | 7.21                          | 7.96                           | 13.01           | 11.81                           |
| <b>VIII</b> | 14.48        | 9.03       | 7.70             | 4.82           | 12.82      | 7.92          | 6.19       | 12.36       | 5.44                          | 5.96                           | 10.42           | 9.21                            |
| <b>IX</b>   | 1.17         | 0.95       | 1.00             | 0.89           | 1.22       | 0.96          | 0.90       | 1.07        | 0.93                          | 0.94                           | 1.09            | 1.02                            |
| <b>X</b>    | 0.56         | 0.47       | 0.46             | 0.41           | 0.59       | 0.44          | 0.40       | 0.52        | 0.42                          | 0.43                           | 0.50            | 0.50                            |
| <b>XI</b>   | 0.88         | 0.75       | 0.77             | 0.71           | 0.97       | 0.74          | 0.70       | 0.81        | 0.72                          | 0.72                           | 0.82            | 0.77                            |
| <b>XII</b>  | 0.61         | 0.50       | 0.50             | 0.45           | 0.64       | 0.48          | 0.45       | 0.55        | 0.46                          | 0.46                           | 0.54            | 0.50                            |

---

|              | <b>B3LYP</b> | <b>BMK</b> | <b>CAM-B3LYP</b> | <b>LC-BLYP</b> | <b>M06</b> | <b>M06-2X</b> | <b>M11</b> | <b>PBE0</b> | <b><math>\omega</math>B97</b> | <b><math>\omega</math>B97X</b> | <b>LC-BLYP*</b> | <b><math>\omega</math>B97X*</b> |
|--------------|--------------|------------|------------------|----------------|------------|---------------|------------|-------------|-------------------------------|--------------------------------|-----------------|---------------------------------|
| <b>XIII</b>  | 7.57         | 5.75       | 5.08             | 3.62           | 6.70       | 4.86          | 4.56       | 6.47        | 3.87                          | 4.20                           | 5.35            | 4.85                            |
| <b>XIV</b>   | 9.84         | 7.16       | 6.28             | 4.22           | 8.43       | 5.89          | 5.48       | 8.30        | 4.51                          | 5.00                           | 7.19            | 6.35                            |
| <b>XV</b>    | 24.29        | 17.38      | 14.46            | 8.75           | 20.58      | 13.78         | 12.74      | 21.12       | 9.97                          | 11.43                          | 18.14           | 15.14                           |
| <b>XVI</b>   | 13.59        | 8.90       | 7.92             | 4.84           | 11.32      | 7.78          | 7.00       | 11.73       | 5.49                          | 6.21                           | 11.03           | 8.87                            |
| <b>XVII</b>  | 11.87        | 8.66       | 7.52             | 4.97           | 10.37      | 7.19          | 6.74       | 10.16       | 5.39                          | 6.04                           | 10.17           | 8.24                            |
| <b>XVIII</b> | 6.92         | 5.37       | 4.74             | 3.40           | 6.20       | 4.67          | 4.52       | 6.15        | 3.70                          | 4.01                           | 5.99            | 5.10                            |
| <b>XIX</b>   | 9.13         | 3.85       | 3.52             | 2.49           | 5.96       | 3.36          | 2.94       | 6.51        | 2.76                          | 2.88                           | 4.19            | 3.65                            |
| <b>XX</b>    | 3.32         | 1.97       | 1.87             | 1.49           | 2.61       | 1.90          | 1.72       | 2.72        | 1.62                          | 1.66                           | 2.30            | 2.03                            |
| <b>XXI</b>   | 4.91         | 2.30       | 2.06             | 1.59           | 3.23       | 2.13          | 1.88       | 3.76        | 1.73                          | 1.78                           | 2.64            | 2.30                            |
| <b>XXII</b>  | 7.17         | 2.85       | 2.49             | 1.75           | 4.84       | 2.38          | 2.03       | 5.11        | 1.94                          | 2.02                           | 3.28            | 2.83                            |
| <b>XXIII</b> | 6.10         | 2.92       | 2.55             | 1.88           | 4.38       | 2.62          | 2.30       | 4.76        | 2.03                          | 2.12                           | 3.60            | 2.98                            |
| <b>XXIV</b>  | 2.42         | 1.57       | 1.50             | 1.25           | 2.02       | 1.51          | 1.41       | 2.04        | 1.35                          | 1.38                           | 1.97            | 1.68                            |

Table S18: Computed value of  $\frac{1}{\langle \tilde{\nu}_f^{-3} \rangle} (\times 10^{13})$  for all molecules for the calculation of fluorescence lifetimes using Scheme C. All results are in solvent

|             | <b>B3LYP</b> | <b>BMK</b> | <b>CAM-B3LYP</b> | <b>LC-BLYP</b> | <b>M06</b> | <b>M06-2X</b> | <b>M11</b> | <b>PBE0</b> | <b><math>\omega</math>B97</b> | <b><math>\omega</math>B97X</b> | <b>LC-BLYP*</b> | <b><math>\omega</math>B97X*</b> |
|-------------|--------------|------------|------------------|----------------|------------|---------------|------------|-------------|-------------------------------|--------------------------------|-----------------|---------------------------------|
| <b>I</b>    | 0.821        | 1.018      | 0.854            | 1.382          | 0.809      | 0.861         | 0.959      | 0.896       | 1.200                         | 1.168                          | 1.085           | 0.993                           |
| <b>II</b>   | 0.604        | 0.640      | 0.663            | 1.020          | 0.607      | 0.684         | 0.766      | 0.666       | 0.961                         | 0.922                          | 0.833           | 0.739                           |
| <b>III</b>  | 0.540        | 0.630      | 0.656            | 1.021          | 0.539      | 0.670         | 0.763      | 0.600       | 0.716                         | 0.711                          | 0.676           | 0.777                           |
| <b>IV</b>   | 0.589        | 0.726      | 0.720            | 0.838          | 0.582      | 0.731         | 0.824      | 0.642       | 0.797                         | 0.782                          | 0.735           | 0.761                           |
| <b>V</b>    | 0.776        | 0.944      | 1.019            | 1.223          | 0.745      | 0.999         | 1.131      | 0.831       | 1.143                         | 1.122                          | 1.036           | 0.842                           |
| <b>VI</b>   | 1.199        | 1.654      | 1.766            | 2.343          | 1.330      | 1.742         | 1.986      | 1.350       | 2.151                         | 2.046                          | 1.794           | 1.668                           |
| <b>VII</b>  | 1.100        | 1.475      | 1.624            | 2.176          | 1.223      | 1.521         | 1.796      | 1.232       | 1.974                         | 1.892                          | 1.644           | 1.302                           |
| <b>VIII</b> | 1.135        | 1.700      | 1.805            | 2.412          | 1.395      | 1.733         | 2.034      | 1.373       | 2.234                         | 2.126                          | 1.868           | 1.372                           |
| <b>IX</b>   | 1.266        | 1.469      | 1.447            | 1.664          | 1.260      | 1.497         | 1.655      | 1.388       | 1.471                         | 1.459                          | 1.401           | 1.391                           |
| <b>X</b>    | 1.079        | 1.296      | 1.355            | 1.710          | 1.078      | 1.426         | 1.637      | 1.177       | 1.600                         | 1.537                          | 1.411           | 1.378                           |
| <b>XI</b>   | 1.731        | 2.053      | 2.035            | 2.350          | 1.528      | 2.079         | 2.395      | 1.871       | 2.263                         | 2.203                          | 2.121           | 1.978                           |

|              |              |            |                  |                |            |               |            |             |                               |                                |                 |                                 |
|--------------|--------------|------------|------------------|----------------|------------|---------------|------------|-------------|-------------------------------|--------------------------------|-----------------|---------------------------------|
| <b>XII</b>   | 1.353        | 1.677      | 1.752            | 2.145          | 1.340      | 1.799         | 2.095      | 1.506       | 2.058                         | 1.990                          | 1.869           | 1.636                           |
|              | <b>B3LYP</b> | <b>BMK</b> | <b>CAM-B3LYP</b> | <b>LC-BLYP</b> | <b>M06</b> | <b>M06-2X</b> | <b>M11</b> | <b>PBE0</b> | <b><math>\omega</math>B97</b> | <b><math>\omega</math>B97X</b> | <b>LC-BLYP*</b> | <b><math>\omega</math>B97X*</b> |
| <b>XIII</b>  | 1.398        | 1.903      | 1.990            | 2.489          | 1.552      | 1.914         | 2.089      | 1.520       | 2.249                         | 2.188                          | 1.980           | 1.829                           |
| <b>XIV</b>   | 1.506        | 1.993      | 2.084            | 2.644          | 1.677      | 1.928         | 2.123      | 1.725       | 2.416                         | 2.282                          | 2.016           | 1.750                           |
| <b>XV</b>    | 0.868        | 1.127      | 1.205            | 1.626          | 0.935      | 1.214         | 1.268      | 0.961       | 1.469                         | 1.357                          | 1.223           | 1.019                           |
| <b>XVI</b>   | 0.949        | 1.277      | 1.344            | 1.860          | 1.043      | 1.262         | 1.423      | 1.013       | 1.729                         | 1.373                          | 1.386           | 1.058                           |
| <b>XVII</b>  | 1.030        | 1.347      | 1.438            | 1.844          | 1.081      | 1.335         | 1.501      | 1.164       | 1.725                         | 1.625                          | 1.449           | 1.152                           |
| <b>XVIII</b> | 1.116        | 1.318      | 1.459            | 1.836          | 1.220      | 1.457         | 1.388      | 1.130       | 1.474                         | 1.503                          | 1.466           | 1.207                           |
| <b>XIX</b>   | 0.532        | 1.008      | 0.952            | 1.095          | 0.791      | 0.961         | 1.044      | 0.702       | 0.951                         | 0.986                          | 1.296           | 0.909                           |
| <b>XX</b>    | 1.059        | 1.526      | 1.523            | 1.683          | 1.285      | 1.444         | 1.548      | 1.258       | 1.452                         | 1.562                          | 1.528           | 1.328                           |
| <b>XXI</b>   | 0.805        | 1.478      | 1.781            | 1.750          | 1.246      | 1.675         | 1.581      | 0.987       | 1.980                         | 1.666                          | 1.602           | 1.327                           |
| <b>XXII</b>  | 0.642        | 1.174      | 1.317            | 1.535          | 1.023      | 1.330         | 1.426      | 0.810       | 1.444                         | 1.462                          | 1.406           | 1.061                           |
| <b>XXIII</b> | 0.737        | 1.183      | 1.259            | 1.367          | 0.951      | 1.207         | 1.276      | 0.884       | 1.301                         | 1.377                          | 1.310           | 1.128                           |
| <b>XXIV</b>  | 0.866        | 1.202      | 1.168            | 1.243          | 0.990      | 1.159         | 1.180      | 0.997       | 1.204                         | 1.228                          | 1.244           | 1.047                           |



Table S19: Fluorescence lifetimes (in ns) of all molecules investigated in this study calculated using Scheme C. All results are in solvent.

|             | <b>B3LYP</b> | <b>BMK</b> | <b>CAM-B3LYP</b> | <b>LC-BLYP</b> | <b>M06</b> | <b>M06-2X</b> | <b>M11</b> | <b>PBE0</b> | $\omega$ <b>B97</b> | $\omega$ <b>B97X</b> | <b>LC-BLYP*</b> | $\omega$ <b>B97X*</b> |
|-------------|--------------|------------|------------------|----------------|------------|---------------|------------|-------------|---------------------|----------------------|-----------------|-----------------------|
| <b>I</b>    | 20.34        | 14.22      | 15.36            | 7.03           | 19.32      | 16.38         | 12.64      | 18.02       | 9.46                | 10.07                | 13.85           | 13.03                 |
| <b>II</b>   | 18.83        | 15.45      | 13.34            | 7.33           | 17.44      | 13.96         | 10.68      | 16.42       | 7.93                | 8.56                 | 12.62           | 11.78                 |
| <b>III</b>  | 9.06         | 7.12       | 6.67             | 4.00           | 8.86       | 6.74          | 5.60       | 8.02        | 5.71                | 5.86                 | 6.02            | 6.16                  |
| <b>IV</b>   | 7.11         | 5.26       | 5.20             | 4.16           | 6.93       | 5.25          | 4.43       | 6.41        | 4.42                | 4.59                 | 5.26            | 4.93                  |
| <b>V</b>    | 10.42        | 7.56       | 7.08             | 5.34           | 10.11      | 6.99          | 5.66       | 9.08        | 5.57                | 5.94                 | 8.49            | 8.11                  |
| <b>VI</b>   | 23.30        | 13.95      | 11.94            | 7.49           | 20.57      | 12.28         | 9.55       | 19.71       | 8.51                | 9.31                 | 11.62           | 10.88                 |
| <b>VII</b>  | 22.77        | 14.25      | 11.74            | 7.28           | 20.20      | 12.72         | 9.49       | 19.45       | 8.42                | 9.13                 | 15.45           | 14.42                 |
| <b>VIII</b> | 18.29        | 10.13      | 8.67             | 5.42           | 14.55      | 9.19          | 6.88       | 14.45       | 6.10                | 6.66                 | 12.49           | 10.34                 |
| <b>IX</b>   | 1.57         | 1.35       | 1.43             | 1.34           | 1.63       | 1.38          | 1.31       | 1.44        | 1.49                | 1.47                 | 1.53            | 1.53                  |
| <b>X</b>    | 0.73         | 0.64       | 0.65             | 0.59           | 0.78       | 0.61          | 0.57       | 0.68        | 0.62                | 0.62                 | 0.62            | 0.63                  |
| <b>XI</b>   | 0.99         | 0.84       | 0.89             | 0.84           | 1.19       | 0.87          | 0.80       | 0.92        | 0.85                | 0.86                 | 0.93            | 0.90                  |

|              |              |            |                  |                |            |               |            |             |                               |                                |                 |                                 |
|--------------|--------------|------------|------------------|----------------|------------|---------------|------------|-------------|-------------------------------|--------------------------------|-----------------|---------------------------------|
| <b>XII</b>   | 0.68         | 0.56       | 0.57             | 0.52           | 0.72       | 0.55          | 0.52       | 0.62        | 0.53                          | 0.54                           | 0.61            | 0.57                            |
|              | <b>B3LYP</b> | <b>BMK</b> | <b>CAM-B3LYP</b> | <b>LC-BLYP</b> | <b>M06</b> | <b>M06-2X</b> | <b>M11</b> | <b>PBE0</b> | <b><math>\omega</math>B97</b> | <b><math>\omega</math>B97X</b> | <b>LC-BLYP*</b> | <b><math>\omega</math>B97X*</b> |
| <b>XIII</b>  | 10.24        | 6.72       | 5.99             | 4.13           | 8.85       | 5.91          | 5.21       | 8.88        | 4.60                          | 4.96                           | 6.46            | 5.85                            |
| <b>XIV</b>   | 12.58        | 8.32       | 7.42             | 4.92           | 10.76      | 7.44          | 6.48       | 10.26       | 5.37                          | 6.04                           | 9.09            | 7.94                            |
| <b>XV</b>    | 32.20        | 21.52      | 18.79            | 11.17          | 28.85      | 17.52         | 15.99      | 27.63       | 12.72                         | 14.91                          | 23.81           | 19.30                           |
| <b>XVI</b>   | 16.38        | 10.52      | 9.58             | 5.77           | 13.80      | 9.74          | 8.29       | 14.61       | 6.41                          | 8.55                           | 13.73           | 10.79                           |
| <b>XVII</b>  | 14.79        | 10.52      | 8.94             | 5.93           | 13.99      | 9.06          | 7.88       | 12.38       | 6.42                          | 7.24                           | 12.47           | 9.85                            |
| <b>XVIII</b> | 9.12         | 6.82       | 5.97             | 4.16           | 8.19       | 5.78          | 5.79       | 8.39        | 5.36                          | 5.46                           | 7.81            | 6.81                            |
| <b>XIX</b>   | 13.99        | 5.27       | 5.25             | 3.93           | 8.09       | 5.13          | 4.39       | 9.47        | 4.69                          | 4.68                           | 5.77            | 5.72                            |
| <b>XX</b>    | 4.23         | 2.48       | 2.43             | 2.04           | 3.34       | 2.53          | 2.27       | 3.38        | 2.42                          | 2.29                           | 2.96            | 2.21                            |
| <b>XXI</b>   | 6.99         | 2.89       | 2.30             | 2.15           | 4.06       | 2.41          | 2.46       | 5.25        | 1.94                          | 2.36                           | 3.36            | 2.84                            |
| <b>XXII</b>  | 9.90         | 3.79       | 3.18             | 2.38           | 5.44       | 3.07          | 2.66       | 7.08        | 2.61                          | 2.65                           | 4.36            | 3.62                            |
| <b>XXIII</b> | 7.80         | 3.66       | 3.25             | 2.67           | 5.52       | 3.36          | 3.01       | 6.01        | 2.87                          | 2.79                           | 4.07            | 3.40                            |
| <b>XXIV</b>  | 3.27         | 2.01       | 2.05             | 1.83           | 2.74       | 2.04          | 1.97       | 2.71        | 1.93                          | 1.91                           | 2.50            | 2.20                            |

## 8. Ground and excited state optimised geometries for all molecules for the LC-BLYP\* functional

I

| Ground state optimised structure | Excited state optimised structure |
|----------------------------------|-----------------------------------|
| C -9.638675 -1.125724 -0.002854  | C -9.678733 -1.126941 -0.002904   |
| C -8.269291 -1.110586 0.000668   | C -8.273235 -1.097651 0.000641    |
| C -7.550096 0.127156 0.003554    | C -7.563788 0.118187 0.003467     |
| C -8.288065 1.358646 0.002666    | C -8.307438 1.346862 0.002591     |
| C -9.716167 1.306017 -0.001027   | C -9.708062 1.296727 -0.000944    |
| C -10.368437 0.100034 -0.003694  | C -10.394650 0.065813 -0.003679   |
| C -6.150732 0.163530 0.007205    | C -6.147695 0.158413 0.007121     |
| C -7.570031 2.576178 0.005486    | C -7.575692 2.585971 0.005414     |
| C -6.156992 2.612267 0.009147    | C -6.137143 2.623506 0.009218     |
| C -5.439119 1.368973 0.010015    | C -5.424557 1.376591 0.010021     |
| C -4.007849 1.396202 0.013747    | C -4.017162 1.405903 0.013687     |
| H -3.470382 0.442050 0.014407    | H -3.472210 0.455839 0.014299     |
| C -3.329168 2.585634 0.016437    | C -3.308499 2.619971 0.016547     |
| C -4.046024 3.818967 0.015542    | C -4.003202 3.825204 0.015785     |
| C -5.417026 3.834855 0.012013    | C -5.412668 3.823236 0.012139     |
| H -5.594695 -0.781540 0.007887   | H -5.591880 -0.786254 0.007762    |
| H -10.179963 -2.076189 -0.005049 | H -10.201241 -2.087571 -0.005033  |
| H -7.696521 -2.044017 0.001340   | H -7.707741 -2.035691 0.001249    |
| H -10.279581 2.244350 -0.001691  | H -10.274597 2.233664 -0.001564   |
| H -11.462135 0.074583 -0.006509  | H -11.487913 0.058210 -0.006403   |
| H -2.235433 2.596874 0.019283    | H -2.215007 2.609816 0.019358     |
| H -3.492412 4.762537 0.017713    | H -3.465391 4.777061 0.018000     |
| H -5.963331 4.783259 0.011335    | H -5.956199 4.773712 0.011553     |
| C -8.296091 3.810282 0.004609    | C -8.292910 3.804627 0.004355     |
| N -8.888751 4.817612 0.003897    | N -8.889353 4.816745 0.003448     |

## II

| Ground state optimised structure | Excited state optimised structure |
|----------------------------------|-----------------------------------|
| C -7.737310 -0.662219 -0.014677  | C -7.775489 -0.665419 -0.014857   |
| C -6.366751 -0.664416 -0.009804  | C -6.371269 -0.649622 -0.010023   |
| C -5.639508 0.565645 -0.010501   | C -5.653336 0.559958 -0.010598    |
| C -6.366431 1.802119 -0.016373   | C -6.378125 1.792893 -0.016383    |
| C -7.794916 1.765009 -0.021328   | C -7.784219 1.754036 -0.021145    |
| C -8.459636 0.566441 -0.020495   | C -8.481087 0.534848 -0.020375    |
| C -4.227713 0.605947 -0.005599   | C -4.218703 0.590531 -0.005546    |
| C -5.644648 3.016097 -0.017073   | C -5.653657 3.031513 -0.017166    |
| C -4.232853 3.056400 -0.012175   | C -4.219024 3.062086 -0.012116    |
| C -3.505930 1.819926 -0.006314   | C -3.494236 1.829151 -0.006331    |
| C -2.077445 1.857035 -0.001403   | C -2.088141 1.868008 -0.001571    |
| H -1.526067 0.911898 0.003030    | H -1.532804 0.924507 0.002789     |
| C -1.412724 3.055603 -0.002273   | C -1.391273 3.087196 -0.002343    |
| C -2.135050 4.284263 -0.008060   | C -2.096871 4.287464 -0.007859    |
| C -3.505609 4.286460 -0.012877   | C -3.501091 4.271666 -0.012691    |
| H -8.283784 -1.609534 -0.014101  | H -8.304742 -1.621962 -0.014237   |
| H -5.809187 -1.605918 -0.005302  | H -5.817108 -1.593811 -0.005677   |
| H -8.346294 2.710146 -0.025776   | H -8.339557 2.697537 -0.025505    |
| H -9.553143 0.549667 -0.024303   | H -9.574280 0.537635 -0.024127    |
| H -0.319217 3.072377 0.001500    | H -0.298081 3.084410 0.001408     |
| H -1.588577 5.231579 -0.008664   | H -1.567618 5.244006 -0.008480    |
| H -4.063173 5.227963 -0.017355   | H -4.055252 5.215855 -0.017036    |
| C -3.501246 -0.629555 0.000306   | C -3.501156 -0.629540 0.000495    |
| N -2.909123 -1.636683 0.005097   | N -2.905432 -1.641397 0.005490    |
| C -6.371114 4.251600 -0.022985   | C -6.371204 4.251585 -0.023205    |
| N -6.963235 5.258729 -0.027783   | N -6.966929 5.263442 -0.028198    |

### III

| Ground state optimised structure | Excited state optimised structure |
|----------------------------------|-----------------------------------|
| C -8.482140 -8.819602 0.075783   | C -8.470245 -8.802608 0.075663    |
| C -7.062821 -8.856863 0.024633   | C -7.056358 -8.846183 0.024510    |
| C -6.321507 -7.632871 0.010788   | C -6.311410 -7.616210 0.010553    |
| C -7.027255 -6.385722 0.048576   | C -7.010112 -6.371008 0.048054    |
| C -8.415050 -6.403686 0.097658   | C -8.438286 -6.383870 0.098673    |
| C -9.143339 -7.612553 0.111524   | C -9.144778 -7.578938 0.112019    |
| C -4.889735 -7.681170 -0.040601  | C -4.884623 -7.659216 -0.040553   |
| C -6.259947 -5.119062 0.034242   | C -6.265069 -5.141020 0.034161    |
| C -4.828169 -5.167372 -0.017123  | C -4.838280 -5.184027 -0.016885   |
| C -4.122433 -6.414524 -0.054892  | C -4.139576 -6.429229 -0.054325   |
| C -4.086864 -3.943377 -0.030965  | C -4.093332 -3.954054 -0.030845   |
| C -4.776957 -2.702046 0.006503   | C -4.786491 -2.720459 0.006639    |
| C -6.152580 -2.674690 0.055624   | C -6.183034 -2.688931 0.056524    |
| C -6.886457 -3.880184 0.069233   | C -6.914806 -3.868693 0.070276    |
| H -9.033935 -9.765580 0.086180   | H -9.028030 -9.745046 0.086435    |
| H -8.977416 -5.467462 0.127070   | H -8.993949 -5.445080 0.127825    |
| H -10.236266 -7.579565 0.150867  | H -10.238195 -7.560895 0.151231   |
| H -4.194267 -1.774755 -0.004389  | H -4.209781 -1.789433 -0.003823   |
| H -6.687879 -1.720881 0.084623   | H -6.705243 -1.727721 0.085124    |
| H -7.976297 -3.815152 0.108564   | H -8.003825 -3.810877 0.109469    |
| C -2.734634 -6.396546 -0.103899  | C -2.711395 -6.416368 -0.104782   |
| H -2.172217 -7.332742 -0.133252  | H -2.155729 -7.355159 -0.133847   |
| C -2.006351 -5.187682 -0.117740  | C -2.004903 -5.221301 -0.118093   |
| H -0.913421 -5.220672 -0.157013  | H -0.911481 -5.239345 -0.157188   |
| C -2.667549 -3.980628 -0.082049  | C -2.679440 -3.997629 -0.081867   |
| H -2.115752 -3.034652 -0.092422  | H -2.121655 -3.055191 -0.092636   |
| C -4.997126 -10.125541 -0.062081 | C -4.966666 -10.111302 -0.063122  |
| H -4.461835 -11.079352 -0.091150 | H -4.444462 -11.072511 -0.091844  |
| C -6.372750 -10.098177 -0.012898 | C -6.363204 -10.079776 -0.013107  |
| H -6.955438 -11.025470 -0.002022 | H -6.939915 -11.010801 -0.002652  |
| C -4.263241 -8.920058 -0.075670  | C -4.234893 -8.931541 -0.076836   |
| H -3.173410 -8.985144 -0.115069  | H -3.145876 -8.989357 -0.116116   |

## IV

| Ground state optimised structure | Excited state optimised structure |
|----------------------------------|-----------------------------------|
| C -8.494693 -8.775264 0.076499   | C -8.486014 -8.760456 0.076156    |
| C -7.076135 -8.828694 0.025409   | C -7.071794 -8.818197 0.025338    |
| C -6.336860 -7.613959 0.011564   | C -6.322877 -7.600425 0.011232    |
| C -7.021939 -6.362612 0.048849   | C -7.003975 -6.352879 0.048346    |
| C -8.404775 -6.349424 0.098406   | C -8.424207 -6.336427 0.099451    |
| C -9.139301 -7.556743 0.112147   | C -9.144899 -7.527430 0.112720    |
| C -4.910670 -7.691455 -0.040070  | C -4.902985 -7.670562 -0.040101   |
| C -6.239145 -5.109667 0.033732   | C -6.246797 -5.130635 0.033762    |
| C -4.812920 -5.187205 -0.017905  | C -4.826908 -5.200773 -0.017572   |
| C -4.127840 -6.438538 -0.055190  | C -4.145808 -6.448321 -0.054688   |
| C -4.073634 -3.972486 -0.031751  | C -4.077991 -3.983001 -0.031680   |
| C -4.805294 -2.757613 0.006767   | C -4.813261 -2.778406 0.006787    |
| C -6.180648 -2.804003 0.055238   | C -6.212441 -2.825837 0.056014    |
| H -9.061207 -9.712291 0.086913   | H -9.055281 -9.695815 0.086250    |
| H -8.914458 -5.382774 0.126644   | H -8.920998 -5.363606 0.127557    |
| H -10.232182 -7.517200 0.151588  | H -10.237884 -7.498407 0.152094   |
| H -4.278112 -1.798415 -0.002228  | H -4.296324 -1.813659 -0.001879   |
| H -6.771416 -1.882236 0.085753   | H -6.783714 -1.890219 0.085860    |
| C -2.744990 -6.451753 -0.104752  | C -2.725577 -6.464772 -0.105796   |
| H -2.235326 -7.418413 -0.132992  | H -2.228785 -7.437592 -0.133902   |
| C -2.010466 -5.244447 -0.118494  | C -2.004885 -5.273767 -0.119068   |
| H -0.917586 -5.283986 -0.157938  | H -0.911901 -5.302791 -0.158446   |
| C -2.655084 -4.025911 -0.082843  | C -2.663770 -4.040742 -0.082502   |
| H -2.088567 -3.088885 -0.093258  | H -2.094503 -3.105383 -0.092598   |
| C -4.969115 -9.997244 -0.061577  | C -4.937340 -9.975364 -0.062350   |
| H -4.378434 -10.919072 -0.092088 | H -4.366071 -10.910984 -0.092194  |
| C -6.344516 -10.043566 -0.013105 | C -6.336523 -10.022792 -0.013127  |
| H -6.871729 -11.002744 -0.004109 | H -6.853460 -10.987539 -0.004462  |
| N -6.897357 -3.957684 0.068930   | N -6.934271 -3.948424 0.070216    |
| N -4.252349 -8.843703 -0.075273  | N -4.215506 -8.852781 -0.076552   |

| Ground state optimised structure | Excited state optimised structure |
|----------------------------------|-----------------------------------|
| C -2.593071 0.271434 0.001989    | C -2.628288 0.256680 0.063746     |
| C -1.220345 0.267798 0.021140    | C -1.221678 0.275450 0.119777     |
| C -0.470949 1.491704 -0.002302   | C -0.486758 1.476433 0.019435     |
| C -1.195236 2.740180 -0.018490   | C -1.215976 2.721174 -0.038408    |
| C -2.629492 2.697177 -0.053999   | C -2.622677 2.667827 -0.142811    |
| C -3.307760 1.503624 -0.046455   | C -3.327215 1.450082 -0.091063    |
| C 0.941961 1.495204 0.001078     | C 0.949920 1.493723 -0.001797     |
| C -0.491124 3.965083 -0.009275   | C -0.499315 3.966376 -0.011106    |
| C 0.921745 3.968586 0.003352     | C 0.937283 3.983796 0.014797      |
| C 1.646143 2.720080 -0.002402    | C 1.666675 2.738759 -0.033712     |
| C 3.080710 2.762971 -0.021638    | C 3.073710 2.791533 -0.133805     |
| H 3.630554 1.818093 -0.048833    | H 3.632272 1.859930 -0.252498     |
| C 3.758900 3.956518 -0.008482    | C 3.778093 4.009550 -0.086519     |
| C 3.043749 5.188801 0.029682     | C 3.078676 5.203785 0.059391      |
| C 1.670892 5.192511 0.033222     | C 1.671888 5.185317 0.110904      |
| H -3.142996 -0.674760 0.021830   | H -3.159117 -0.697465 0.134623    |
| H -0.673005 -0.678282 0.055882   | H -0.683320 -0.667038 0.245896    |
| H -3.179014 3.641974 -0.089168   | H -3.180845 3.598746 -0.268510    |
| H -4.401916 1.495903 -0.075729   | H -4.418869 1.453728 -0.164959    |
| H 4.853320 3.964164 -0.025283    | H 4.869982 4.005503 -0.156825     |
| H 3.593449 6.135016 0.054191     | H 3.609281 6.158310 0.126723      |
| H 1.123263 6.138678 0.060174     | H 1.133127 6.128482 0.230044      |
| C 1.691054 0.204366 0.010773     | C 1.697157 0.221353 0.010772      |
| C 2.343164 -0.233927 1.174661    | C 2.641992 -0.054778 1.022178     |
| C 1.756494 -0.594030 -1.142583   | C 1.488879 -0.755469 -0.986211    |
| C 3.043785 -1.444405 1.187048    | C 3.343474 -1.261966 1.040609     |
| H 2.295467 0.384842 2.077466     | H 2.804655 0.685970 1.812189      |
| C 2.459886 -1.802994 -1.133959   | C 2.202328 -1.955898 -0.976503    |
| H 1.249705 -0.257489 -2.053678   | H 0.771017 -0.550754 -1.787484    |
| C 3.104711 -2.231829 0.031724    | C 3.130248 -2.217077 0.039108     |
| H 3.544518 -1.772955 2.103430    | H 4.060381 -1.459139 1.844241     |
| H 2.503485 -2.412538 -2.042266   | H 2.033703 -2.691938 -1.769282    |

H 3.653969 -3.178600 0.039761  
C -1.240324 5.255883 -0.010421  
C -1.291538 6.052929 -1.165437  
C -1.907015 5.695387 1.144723  
C -1.995285 7.261712 -1.167026  
H -0.773364 5.715381 -2.069730  
C -2.607999 6.905700 1.146944  
H -1.870566 5.077636 2.048753  
C -2.654699 7.691756 -0.009979  
H -2.027694 7.870167 -2.076531  
H -3.120204 7.235209 2.056616  
H -3.204246 8.638393 -0.009913

H 3.684579 -3.160721 0.050057  
C -1.246585 5.238795 -0.008055  
C -1.035059 6.210159 -1.009674  
C -2.194675 5.520436 0.998785  
C -1.748506 7.410633 -1.008791  
H -0.314607 6.001057 -1.807479  
C -2.896178 6.727707 1.008389  
H -2.359890 4.784004 1.792287  
C -2.679685 7.677344 0.002396  
H -1.577308 8.142342 -1.805017  
H -3.615674 6.929269 1.808611  
H -3.234019 8.621042 0.006409



## VI

| Ground state optimised structure | Excited state optimised structure |
|----------------------------------|-----------------------------------|
| C -7.678410 -5.354807 -0.064701  | C -7.705784 -5.331448 -0.066548   |
| C -6.297149 -5.384472 0.000114   | C -6.297156 -5.390229 0.000364    |
| C -5.544967 -4.193341 -0.013047  | C -5.532549 -4.221772 -0.011704   |
| C -6.219224 -2.956538 -0.093953  | C -6.226335 -2.978821 -0.093593   |
| C -7.628072 -2.926883 -0.160212  | C -7.622194 -2.915811 -0.160197   |
| C -8.340923 -4.112695 -0.145243  | C -8.369536 -4.107677 -0.146357   |
| C -4.078935 -4.240698 0.057012   | C -4.073052 -4.251160 0.056755    |
| C -4.126559 -1.742530 -0.044773  | C -4.103489 -1.747877 -0.043754   |
| C -3.390633 -2.943668 0.037169   | C -3.371981 -2.969015 0.038894    |
| C -1.984532 -2.883328 0.099914   | C -1.979333 -2.886236 0.100681    |
| H -1.440969 -3.830375 0.162533   | H -1.409483 -3.816410 0.163809    |
| C -1.322717 -1.669003 0.082418   | C -1.329394 -1.633516 0.081527    |
| C -2.069043 -0.475466 0.001031   | C -2.059274 -0.448128 0.000646    |
| C -3.451026 -0.504287 -0.061780  | C -3.463592 -0.504248 -0.062749   |
| H -8.254710 -6.283686 -0.053722  | H -8.280125 -6.262383 -0.055129   |
| H -5.747483 -6.327978 0.063503   | H -5.774446 -6.347797 0.063094    |
| H -8.144700 -1.963723 -0.222764  | H -8.119882 -1.942871 -0.221967   |
| H -9.433262 -4.081044 -0.196682  | H -9.459964 -4.067122 -0.197842   |
| H -0.231293 -1.630800 0.131258   | H -0.237187 -1.597947 0.131049    |
| H -1.552957 0.489067 -0.012779   | H -1.551954 0.519208 -0.013762    |
| H -4.027321 0.424353 -0.124045   | H -4.058170 0.412548 -0.125924    |
| N -5.501142 -1.782116 -0.107693  | N -5.478909 -1.820322 -0.105904   |
| H -6.011933 -0.900180 -0.169554  | H -5.991494 -0.933967 -0.167573   |
| O -3.455458 -5.318419 0.129396   | O -3.438139 -5.349616 0.129583    |

## VII

| Ground state optimised structure | Excited state optimised structure |
|----------------------------------|-----------------------------------|
| C -7.638529 -5.403997 -0.140647  | C -7.660114 -5.376568 -0.186742   |
| C -6.270145 -5.388705 0.061367   | C -6.279497 -5.384249 0.087321    |
| C -5.545113 -4.182322 0.056267   | C -5.540199 -4.197346 0.086701    |
| C -6.217598 -2.952458 -0.144704  | C -6.226406 -2.970952 -0.162125   |
| C -7.614606 -2.981100 -0.371408  | C -7.596348 -2.969887 -0.456197   |
| C -8.302508 -4.185194 -0.366380  | C -8.315915 -4.180192 -0.471153   |
| C -4.093781 -4.223043 0.246803   | C -4.102335 -4.211772 0.326025    |
| C -4.128658 -1.741358 -0.096127  | C -4.107861 -1.742838 -0.113009   |
| C -3.402150 -2.940004 0.106084   | C -3.392607 -2.952752 0.135981    |
| C -1.995944 -2.910352 0.160733   | C -1.995988 -2.900663 0.185559    |
| H -1.483496 -3.862790 0.324617   | H -1.458947 -3.826584 0.405928    |
| C -1.296940 -1.726651 0.006627   | C -1.308669 -1.693265 -0.040495   |
| C -2.017194 -0.540516 -0.220539  | C -2.011706 -0.524123 -0.325021   |
| C -3.402890 -0.539119 -0.273775  | C -3.419247 -0.547647 -0.358965   |
| H -8.194027 -6.345609 -0.138196  | H -8.216265 -6.318753 -0.180027   |
| H -5.703209 -6.309551 0.226292   | H -5.748905 -6.313851 0.307868    |
| H -8.164123 -2.062971 -0.581344  | H -8.114242 -2.040561 -0.697978   |
| H -9.380842 -4.177261 -0.552038  | H -9.383814 -4.168591 -0.701996   |
| H -0.204538 -1.712567 0.047390   | H -0.215568 -1.678954 0.003937    |
| H -1.482748 0.402754 -0.368743   | H -1.484205 0.412981 -0.518463    |
| H -3.919785 0.397957 -0.482647   | H -3.960080 0.368626 -0.600339    |
| N -5.517837 -1.752161 -0.124535  | N -5.505171 -1.776181 -0.079308   |
| O -3.483655 -5.285567 0.485516   | O -3.483737 -5.291068 0.589192    |
| C -6.250531 -0.488503 -0.149592  | C -6.237567 -0.515885 -0.005601   |
| H -6.434007 -0.137496 -1.179757  | H -6.442142 -0.117208 -1.015009   |
| H -7.209432 -0.609794 0.369014   | H -7.185290 -0.678472 0.521357    |
| H -5.685264 0.274931 0.398772    | H -5.646725 0.213307 0.561612     |

## VIII

| Ground state optimised structure | Excited state optimised structure |
|----------------------------------|-----------------------------------|
|----------------------------------|-----------------------------------|

|                                 |                                 |
|---------------------------------|---------------------------------|
| C -8.207864 -1.130867 0.414447  | C -8.239858 -1.103355 0.419313  |
| C -6.831735 -1.123853 0.265011  | C -6.837300 -1.118323 0.266195  |
| C -6.120361 0.083959 0.119380   | C -6.115686 0.070484 0.119557   |
| C -6.821519 1.312966 0.125624   | C -6.837346 1.302131 0.128527   |
| C -8.227581 1.299772 0.278580   | C -8.231776 1.316028 0.280432   |
| C -8.900493 0.095559 0.419754   | C -8.935875 0.103806 0.426838   |
| C -4.662965 0.048303 -0.036629  | C -4.665227 0.051801 -0.038334  |
| C -4.753768 2.550067 -0.169818  | C -4.736605 2.558933 -0.173009  |
| C -4.004440 1.349877 -0.184188  | C -3.994831 1.339344 -0.186068  |
| C -2.605107 1.404780 -0.342329  | C -2.607255 1.412183 -0.343895  |
| H -2.065535 0.453070 -0.348740  | H -2.046854 0.473738 -0.353349  |
| C -1.947393 2.614527 -0.483454  | C -1.956111 2.655758 -0.486011  |
| C -2.698334 3.806056 -0.467100  | C -2.688347 3.841264 -0.471010  |
| C -4.076340 3.783328 -0.313644  | C -4.088267 3.794893 -0.313426  |
| H -8.751963 -2.072663 0.526886  | H -8.778925 -2.048804 0.532499  |
| H -6.250035 -2.050394 0.254608  | H -6.277667 -2.057227 0.258276  |
| H -8.783018 2.239867 0.285064   | H -8.773176 2.263852 0.285436   |
| H -9.988497 0.106991 0.536809   | H -10.022069 0.122979 0.544902  |
| H -0.861326 2.648088 -0.605915  | H -0.869120 2.683242 -0.608348  |
| H -2.193242 4.770632 -0.577100  | H -2.190652 4.807976 -0.580219  |
| H -4.640368 4.718265 -0.303757  | H -4.665613 4.721190 -0.300966  |
| O -4.022433 -1.024147 -0.043430 | O -4.012819 -1.040838 -0.046805 |
| C -6.875282 3.754089 -0.005724  | C -6.865522 3.737711 -0.006689  |
| C -7.095388 4.411847 1.206041   | C -7.086226 4.386577 1.208678   |
| C -7.358054 4.276417 -1.207186  | C -7.340312 4.256489 -1.211803  |
| C -7.810726 5.612465 1.213624   | C -7.801759 5.586624 1.213713   |
| H -6.705073 3.979459 2.132730   | H -6.699301 3.951803 2.135182   |
| C -8.072856 5.477360 -1.193933  | C -8.054870 5.457103 -1.195631  |
| H -7.170356 3.739534 -2.142391  | H -7.148867 3.721818 -2.147056  |
| C -8.298882 6.144577 0.015078   | C -8.285097 6.120764 0.014337   |
| H -7.986839 6.133488 2.159284   | H -7.981175 6.105014 2.159942   |
| H -8.454093 5.892609 -2.131479  | H -8.432432 5.874119 -2.133621  |
| H -8.858608 7.084653 0.023310   | H -8.844869 7.060579 0.022670   |
| N -6.136632 2.516115 -0.016547  | N -6.125295 2.497141 -0.017392  |

## IX

| Ground state optimised structure | Excited state optimised structure |
|----------------------------------|-----------------------------------|
| C -7.246144 0.804968 -1.078809   | C -7.215042 0.848116 -1.093238    |
| C -7.252224 0.799295 1.103872    | C -7.206019 0.862060 1.108193     |
| C -8.020515 -0.224629 0.622599   | C -8.004822 -0.202225 0.597287    |
| H -8.583072 -0.973482 1.177668   | H -8.559107 -0.939998 1.178372    |
| C -6.887742 1.285351 2.429058    | C -6.877356 1.299499 2.402110     |
| C -6.049828 2.400930 2.579839    | C -6.027417 2.432573 2.594377     |
| C -7.377091 0.633865 3.573309    | C -7.386684 0.619017 3.552103     |
| C -5.708683 2.855051 3.854747    | C -5.711433 2.852695 3.877929     |
| H -5.667496 2.909947 1.690493    | H -5.635398 2.956124 1.718188     |
| C -7.033252 1.091488 4.844006    | C -7.056696 1.057921 4.822629     |
| H -8.031408 -0.237205 3.465452   | H -8.038407 -0.250575 3.421815    |
| C -6.197564 2.203870 4.990278    | C -6.218629 2.175253 4.998764     |
| H -5.054594 3.725960 3.960458    | H -5.060045 3.721265 4.016415     |
| H -7.420722 0.575488 5.727703    | H -7.451563 0.530405 5.696303     |
| H -5.928683 2.561672 5.988650    | H -5.963663 2.514536 6.007096     |
| C -6.881053 1.288712 -2.407752   | C -6.881037 1.289676 -2.380989    |
| C -6.044395 2.402965 -2.565146   | C -6.029551 2.422618 -2.574236    |
| C -7.379131 0.622302 -3.537353   | C -7.394230 0.602914 -3.526028    |
| C -5.709784 2.845576 -3.845479   | C -5.715087 2.837005 -3.859867    |
| H -5.658882 2.918694 -1.680963   | H -5.635901 2.949357 -1.700567    |
| C -7.040674 1.069946 -4.813234   | C -7.063784 1.038715 -4.797192    |
| H -8.030369 -0.244958 -3.395763  | H -8.044493 -0.262248 -3.369522   |
| C -6.205861 2.181613 -4.971139   | C -6.224315 2.155381 -4.977946    |
| H -5.056733 3.715418 -3.964295   | H -5.063068 3.704558 -4.002833    |
| H -7.431004 0.547610 -5.691897   | H -7.459361 0.509390 -5.669702    |
| H -5.941766 2.530845 -5.973992   | H -5.969538 2.491419 -5.987574    |
| O -6.750465 1.466537 0.008216    | O -6.700736 1.534841 0.011180     |
| N -8.007566 -0.208956 -0.761709  | N -8.003318 -0.201421 -0.734249   |

| Ground state optimised structure | Excited state optimised structure |
|----------------------------------|-----------------------------------|
| C -6.039342 3.110295 -1.033165   | C -6.050643 3.087937 -1.032921    |
| C -5.194639 3.446344 -2.104849   | C -4.725536 3.189342 -1.580869    |
| C -4.484776 4.649597 -2.107059   | C -4.031138 4.389247 -1.579579    |
| C -4.608629 5.541564 -1.036766   | C -4.604579 5.553299 -1.038218    |
| C -5.447309 5.219067 0.035219    | C -5.899216 5.487242 -0.493767    |
| C -6.154526 4.014170 0.036747    | C -6.607416 4.295461 -0.486889    |
| C -6.792034 1.829754 -1.031839   | C -6.772958 1.858140 -1.031193    |
| C -6.230202 0.659467 -1.568020   | C -6.220093 0.637865 -1.576957    |
| C -6.937359 -0.542682 -1.568777  | C -6.913273 -0.541631 -1.576559   |
| C -8.232396 -0.621553 -1.030732  | C -8.248460 -0.651786 -1.030699   |
| C -8.793698 0.548474 -0.493280   | C -8.800692 0.568109 -0.483454    |
| C -8.087609 1.751336 -0.495135   | C -8.107519 1.747604 -0.483861    |
| H -5.107824 2.765115 -2.957779   | H -4.243340 2.309389 -2.011634    |
| H -3.837348 4.894924 -2.954863   | H -3.023874 4.425909 -2.006797    |
| H -4.053583 6.484730 -1.038072   | H -4.051314 6.497165 -1.040540    |
| H -5.546038 5.905997 0.881691    | H -6.358000 6.385645 -0.068488    |
| H -6.791053 3.761074 0.891110    | H -7.609756 4.288021 -0.053841    |
| H -5.216781 0.685844 -1.981624   | H -5.216422 0.642529 -2.006818    |
| H -6.477961 -1.434570 -2.007350  | H -6.428969 -1.420975 -2.006070   |
| H -9.796438 0.516045 -0.054800   | H -9.803809 0.563081 -0.052297    |
| H -8.557583 2.649842 -0.082006   | H -8.591235 2.626618 -0.053020    |
| C -8.984663 -1.902475 -1.030443  | C -8.971944 -1.880889 -1.031474   |
| C -10.376489 -1.919627 -1.224167 | C -10.297637 -1.981789 -0.484861  |
| C -8.321114 -3.126096 -0.836942  | C -8.415939 -3.088092 -1.578965   |
| C -11.084686 -3.123923 -1.223705 | C -10.993271 -3.180975 -0.488686  |
| H -10.908824 -0.978587 -1.397527 | H -10.779304 -1.101998 -0.053160  |
| C -9.027138 -4.331639 -0.838957  | C -9.125362 -4.279161 -1.574604   |
| H -7.240109 -3.132173 -0.662590  | H -7.413284 -3.080929 -2.011276   |
| C -10.412526 -4.335481 -1.031831 | C -10.420537 -4.344753 -1.031389  |
| H -12.167596 -3.115437 -1.382916 | H -12.000954 -3.217284 -0.062427  |
| H -8.491753 -5.273088 -0.680304  | H -8.667148 -5.177343 -2.000963   |
| H -10.966374 -5.279358 -1.032614 | H -10.974778 -5.288049 -1.031066  |

**XI**

| <b>Ground state optimised structure</b> | <b>Excited state optimised structure</b> |
|-----------------------------------------|------------------------------------------|
| C -5.647292 -0.384370 0.011016          | C -5.617967 -0.388224 0.010226           |
| C -4.251911 -0.388986 0.011996          | C -4.228282 -0.398727 0.011278           |
| C -3.538534 0.826119 0.000382           | C -3.499988 0.826110 0.000436            |
| C -4.251525 2.041441 -0.012200          | C -4.227886 2.051172 -0.011413           |
| C -5.646907 2.037249 -0.013113          | C -5.617575 2.041099 -0.012301           |
| C -6.348696 0.826546 -0.001525          | C -6.321912 0.826547 -0.001533           |
| H -6.191423 -1.333857 0.020119          | H -6.165090 -1.336207 0.018619           |
| H -3.698435 -1.332577 0.021770          | H -3.675404 -1.342661 0.020372           |
| H -3.697750 2.984864 -0.021221          | H -3.674704 2.994934 -0.019734           |
| H -6.190737 2.986902 -0.022957          | H -6.164392 2.989252 -0.021459           |
| H -7.443035 0.826713 -0.002268          | H -7.416133 0.826716 -0.002301           |
| C -2.108515 0.825903 0.001353           | C -2.100869 0.825896 0.001394            |
| C -0.887008 0.825720 0.002184           | C -0.856816 0.825712 0.002233            |
| C 0.541413 0.825508 0.003151            | C 0.527261 0.825507 0.003160             |
| C 1.258139 -0.388235 0.012969           | C 1.268517 -0.411529 0.014897            |
| C 1.258511 2.039039 -0.005697           | C 1.268897 2.062326 -0.007590            |
| C 2.649353 -0.388440 0.013910           | C 2.638967 -0.411729 0.015818            |
| H 0.707994 -1.333512 0.019852           | H 0.712301 -1.353335 0.023047            |
| C 2.649725 2.038834 -0.004758           | C 2.639347 2.062122 -0.006691            |
| H 0.708654 2.984479 -0.013325           | H 0.712970 3.004295 -0.016481            |
| C 3.366451 0.825091 0.005061            | C 3.380601 0.825087 0.005057             |
| H 3.199210 -1.333880 0.021538           | H 3.194895 -1.353698 0.024720            |
| H 3.199870 2.984112 -0.011641           | H 3.195563 3.003928 -0.014852            |
| C 4.794875 0.824880 0.006028            | C 4.764681 0.824883 0.005983             |
| C 6.016382 0.824696 0.006858            | C 6.008731 0.824701 0.006820             |
| C 7.446399 0.824480 0.007829            | C 7.407856 0.824489 0.007776             |
| C 8.159390 -0.390840 0.020643           | C 8.135753 -0.400565 0.020147            |
| C 8.159777 2.039582 -0.004016           | C 8.136145 2.049319 -0.003591            |
| C 9.554772 -0.386648 0.021557           | C 9.525443 -0.390491 0.021038            |
| H 7.605614 -1.334261 0.029846           | H 7.582573 -1.344325 0.028877            |
| C 9.555157 2.034966 -0.003037           | C 9.525831 2.038821 -0.002547            |
| H 7.606301 2.983171 -0.013971           | H 7.583266 2.993249 -0.013092            |

|                                |                                |
|--------------------------------|--------------------------------|
| C 10.256561 0.824052 0.009737  | C 10.229779 0.824057 0.009738  |
| H 10.098601 -1.336299 0.031584 | H 10.072261 -1.338639 0.030611 |
| H 10.099289 2.984451 -0.012324 | H 10.072953 2.986801 -0.011359 |
| H 11.350900 0.823885 0.010480  | H 11.324000 0.823890 0.010504  |

## XII

| Ground state optimised structure | Excited state optimised structure |
|----------------------------------|-----------------------------------|
| C -6.042685 3.104075 -1.033432   | C -6.046228 3.096192 -1.032344    |
| C -4.749118 3.179701 -1.577944   | C -4.807593 3.229000 -1.717919    |
| C -4.040151 4.383644 -1.575903   | C -4.106362 4.430908 -1.719687    |
| C -4.614027 5.537086 -1.030832   | C -4.605979 5.548886 -1.036601    |
| C -5.901500 5.475319 -0.487217   | C -5.824468 5.442103 -0.351077    |
| C -6.607570 4.269669 -0.487630   | C -6.532472 4.244157 -0.348446    |
| C -6.794252 1.823873 -1.034630   | C -6.781958 1.844154 -1.031080    |
| C -6.138250 0.598505 -0.829647   | C -6.172581 0.610959 -1.419052    |
| C -6.844461 -0.604424 -0.830450  | C -6.862649 -0.578292 -1.416550   |
| C -8.234274 -0.628495 -1.035898  | C -8.250790 -0.654721 -1.031439   |
| C -8.890248 0.597053 -1.241152   | C -8.859118 0.595108 -0.645481    |
| C -8.183806 1.799813 -1.240669   | C -8.155729 1.776558 -0.642675    |
| H -4.303168 2.287164 -2.029542   | H -4.406014 2.383701 -2.283179    |
| H -3.036651 4.422515 -2.011630   | H -3.160867 4.501246 -2.267127    |
| H -4.059899 6.480903 -1.029718   | H -4.052031 6.492556 -1.038341    |
| H -6.356866 6.369969 -0.050567   | H -6.222677 6.303465 0.194910     |
| H -7.604754 4.223633 -0.037157   | H -7.465317 4.184217 0.218617     |
| H -5.060791 0.590453 -0.634034   | H -5.115313 0.596525 -1.697104    |
| H -6.312299 -1.541322 -0.634957  | H -6.329246 -1.486107 -1.706706   |
| H -9.967629 0.605580 -1.437107   | H -9.911702 0.619341 -0.355215    |
| H -8.715607 2.737008 -1.435784   | H -8.682507 2.693327 -0.364399    |
| C -8.985892 -1.907589 -1.035207  | C -8.971457 -1.880123 -1.032191   |
| C -10.284505 -1.984102 -0.504313 | C -10.359586 -1.956561 -0.647039  |
| C -8.421694 -3.080363 -1.564767  | C -8.363139 -3.129944 -1.418192   |
| C -10.991965 -3.186207 -0.504144 | C -11.049651 -3.145814 -0.644535  |

H -10.743209 -1.089330 -0.070417  
C -9.128240 -4.283094 -1.561972  
H -7.417074 -3.046974 -1.999399  
C -10.427186 -4.359145 -1.032249  
H -12.008854 -3.212895 -0.098640  
H -8.657615 -5.185539 -1.966164  
C -11.179491 -5.638926 -1.029839  
C -11.072239 -6.539416 -2.103745  
C -12.016588 -5.978973 0.046851  
C -11.779628 -7.744310 -2.101398  
H -10.443624 -6.279943 -2.962251  
C -12.726570 -7.182267 0.050059  
H -12.093260 -5.300686 0.903284  
C -12.610617 -8.070497 -1.024393  
H -11.687885 -8.428189 -2.951298  
H -13.367281 -7.431297 0.902051  
H -13.165728 -9.013743 -1.022398

H -10.892979 -1.048756 -0.356837  
C -9.066527 -4.311394 -1.421000  
H -7.310569 -3.154166 -1.708510  
C -10.440285 -4.379002 -1.032550  
H -12.106908 -3.131387 -0.366442  
H -8.539757 -5.228154 -1.699321  
C -11.176014 -5.631040 -1.031286  
C -10.689781 -6.779002 -1.715197  
C -12.414643 -5.763851 -0.345699  
C -11.397787 -7.976947 -1.712566  
H -9.756941 -6.719062 -2.282270  
C -13.115876 -6.965757 -0.343932  
H -12.816217 -4.918554 0.219569  
C -12.616268 -8.083732 -1.027030  
H -10.999584 -8.838306 -2.258562  
H -14.061367 -7.036096 0.203516  
H -13.170218 -9.027401 -1.025290



**XIII**

| <b>Ground state optimised structure</b> | <b>Excited state optimised structure</b> |
|-----------------------------------------|------------------------------------------|
| C -1.248108 -1.328392 -0.182194         | C -1.257103 -1.347525 -0.149604          |
| C -0.025384 -2.122072 0.000604          | C -0.033570 -2.128586 -0.067457          |
| C 1.040572 -1.290236 -0.046679          | C 1.067642 -1.284490 -0.017562           |
| C 1.041060 1.286228 -0.087680           | C 1.068961 1.281937 -0.061440            |
| C -0.024035 2.120401 -0.070755          | C -0.031385 2.125017 -0.139575           |
| C -1.246723 1.323074 -0.236503          | C -1.255402 1.342760 -0.200679           |
| N 0.610837 -0.005661 -0.304323          | N 0.585474 -0.001508 -0.067615           |
| N -0.760974 -0.006681 -0.392221         | N -0.790578 -0.002150 -0.147764          |
| O -2.423635 -1.642583 -0.174463         | O -2.440230 -1.686526 -0.207360          |
| O -2.421375 1.639956 -0.257266          | O -2.437482 1.680560 -0.282228           |
| H 2.106410 1.487598 0.013004            | H 2.137136 1.469274 -0.002810            |
| H 2.106032 -1.489738 0.056567           | H 2.135601 -1.471085 0.047149            |
| H -0.020939 -3.199198 0.142291          | H -0.018589 -3.215977 -0.049072          |
| H -0.018600 3.201428 0.037279           | H -0.015339 3.212419 -0.156324           |

## XIV

| Ground state optimised structure | Excited state optimised structure |
|----------------------------------|-----------------------------------|
| C -1.234738 -1.325595 -0.165666  | C -1.255306 -1.342696 -0.159105   |
| C -0.016481 -2.117462 0.003490   | C -0.033975 -2.121669 -0.073187   |
| C 1.068406 -1.300468 -0.051748   | C 1.086107 -1.291065 -0.005526    |
| C 1.064925 1.298291 -0.091444    | C 1.085895 1.289081 -0.052780     |
| C -0.019965 2.117509 -0.083627   | C -0.035837 2.116976 -0.126122    |
| C -1.235900 1.320327 -0.240616   | C -1.256294 1.335011 -0.195884    |
| N 0.631212 -0.004961 -0.302112   | N 0.602022 -0.001576 -0.060422    |
| N -0.745944 -0.007756 -0.387551  | N -0.788022 -0.003272 -0.148716   |
| O -2.415188 -1.634591 -0.145153  | O -2.442215 -1.684261 -0.214961   |
| O -2.415867 1.631122 -0.265661   | O -2.441610 1.673634 -0.290438    |
| H -0.010196 -3.196727 0.137664   | H -0.017892 -3.210313 -0.055649   |
| H -0.014410 3.200823 0.012597    | H -0.020333 3.205652 -0.140469    |
| C 2.516416 -1.625969 0.061897    | C 2.535109 -1.619687 0.036742     |
| H 3.068256 -1.303923 -0.835627   | H 3.041471 -1.380793 -0.914737    |
| H 2.976142 -1.139316 0.936709    | H 3.062903 -1.092241 0.846638     |
| H 2.636926 -2.712255 0.172291    | H 2.646070 -2.699450 0.210043     |
| C 2.509148 1.624410 0.060491     | C 2.527633 1.621297 0.089191      |
| H 2.913792 1.218922 1.002111     | H 2.908839 1.387573 1.098594      |
| H 3.105252 1.216921 -0.770828    | H 3.155510 1.091922 -0.644268     |
| H 2.635785 2.715484 0.078449     | H 2.657496 2.700661 -0.073278     |

| Ground state optimised structure | Excited state optimised structure |
|----------------------------------|-----------------------------------|
| C -1.240124 -1.293251 -0.218736  | C -1.276213 -1.329898 -0.154024   |
| C -0.019702 -2.048236 0.057539   | C -0.037143 -2.079873 -0.052995   |
| C 1.084908 -1.278017 -0.062940   | C 1.102649 -1.278471 0.001150     |
| C 1.085186 1.271607 -0.118236    | C 1.103281 1.276892 -0.051874     |
| C -0.018781 2.047811 -0.034822   | C -0.034774 2.075453 -0.159350    |
| C -1.238803 1.284322 -0.289252   | C -1.273806 1.322366 -0.234588    |
| N 0.664415 -0.011801 -0.486064   | N 0.617907 -0.001402 -0.060374    |
| N -0.727917 -0.013420 -0.574612  | N -0.796744 -0.003177 -0.161148   |
| O -2.412577 -1.608113 -0.182350  | O -2.450734 -1.702900 -0.221333   |
| O -2.410197 1.605068 -0.288433   | O -2.447085 1.692454 -0.332804    |
| C 2.514127 -1.642753 0.109293    | C 2.533198 -1.650333 0.130842     |
| H 3.115265 -1.308430 -0.750000   | H 3.152457 -1.199665 -0.660227    |
| H 2.937471 -1.198153 1.024262    | H 2.950064 -1.358422 1.109052     |
| H 2.599307 -2.735463 0.194239    | H 2.617029 -2.743258 0.044213     |
| C 2.514419 1.643783 0.034326     | C 2.536812 1.651925 0.026387      |
| H 2.975729 1.143792 0.900254     | H 3.034392 1.207760 0.902664      |
| H 3.089751 1.376872 -0.865898    | H 3.092710 1.354606 -0.878233     |
| H 2.588308 2.729539 0.188329     | H 2.605520 2.745610 0.116852      |
| F -0.037504 -3.355726 0.334302   | F -0.002593 -3.399856 -0.018974   |
| F -0.035612 3.365907 0.186049    | F 0.000742 3.395526 -0.187985     |

## XVI

| Ground state optimised structure | Excited state optimised structure |
|----------------------------------|-----------------------------------|
| C -1.245405 -1.296646 -0.215521  | C -1.276560 -1.319859 -0.187440   |
| C -0.026809 -2.083874 0.010774   | C -0.048342 -2.096975 -0.087227   |
| C 1.075715 -1.289658 -0.068727   | C 1.092756 -1.281860 -0.007516    |
| C 1.086139 1.283859 -0.104182    | C 1.106169 1.277389 -0.044011     |
| C -0.007619 2.093484 -0.065364   | C -0.027899 2.102103 -0.125251    |
| C -1.232080 1.313931 -0.281095   | C -1.263572 1.335279 -0.210577    |
| N 0.649301 -0.005206 -0.403018   | N 0.617526 -0.000246 -0.063972    |
| N -0.733959 -0.000474 -0.502141  | N -0.790684 0.005641 -0.168332    |
| O -2.421059 -1.605982 -0.192766  | O -2.456674 -1.670534 -0.263953   |
| O -2.403665 1.638900 -0.297490   | O -2.439266 1.695999 -0.305474    |
| C 2.512657 -1.637368 0.072946    | C 2.531029 -1.640576 0.065342     |
| H 3.079257 -1.349500 -0.827271   | H 3.057739 -1.432321 -0.882669    |
| H 2.969582 -1.136393 0.941778    | H 3.053047 -1.106029 0.874795     |
| H 2.608113 -2.723313 0.214173    | H 2.613773 -2.719718 0.261964     |
| C 2.522847 1.616991 0.071042     | C 2.542413 1.623825 0.096490      |
| H 2.904969 1.244407 1.036344     | H 2.920916 1.415818 1.112840      |
| H 3.136676 1.184737 -0.734323    | H 3.173574 1.080941 -0.624616     |
| H 2.643782 2.709726 0.059268     | H 2.663373 2.701227 -0.089581     |
| Cl -0.064308 -3.773959 0.285925  | Cl -0.039353 -3.786855 -0.059368  |
| Cl -0.026462 3.791676 0.156901   | Cl -0.002295 3.792088 -0.134196   |

## XVII

| Ground state optimised structure | Excited state optimised structure |
|----------------------------------|-----------------------------------|
| C -1.186022 -1.310884 -0.277713  | C -1.238025 -1.331578 -0.082398   |
| C 0.016561 -2.114948 -0.039371   | C -0.018124 -2.126892 -0.008204   |
| C 1.102963 -1.295776 -0.115913   | C 1.105894 -1.286004 0.017961     |
| C 1.103053 1.289682 -0.157776    | C 1.106316 1.285167 -0.013530     |
| C 0.017246 2.112149 -0.112488    | C -0.015117 2.124833 -0.106916    |
| C -1.184439 1.303633 -0.340554   | C -1.235051 1.328140 -0.164762    |
| N 0.685414 -0.008493 -0.468196   | N 0.632506 -0.000684 -0.023467    |
| N -0.694389 -0.010097 -0.570624  | N -0.774292 -0.001459 -0.098973   |
| O -2.367418 -1.627181 -0.257456  | O -2.424826 -1.691636 -0.131358   |
| O -2.364232 1.625743 -0.362635   | O -2.420656 1.686695 -0.244423    |
| C -0.058456 -3.581725 0.214798   | C -0.031756 -3.605581 0.019039    |
| H -0.622965 -3.792244 1.138492   | H 0.450439 -4.004082 0.930677     |
| H -0.587963 -4.093161 -0.606624  | H -1.073392 -3.959687 -0.011285   |
| H 0.941323 -4.031503 0.314599    | H 0.510598 -4.034257 -0.844349    |
| C -0.058512 3.585443 0.100619    | C -0.027608 3.603504 -0.134585    |
| H -0.558078 4.079375 -0.749716   | H 0.548427 4.002816 -0.989596     |
| H -0.652578 3.819843 0.999755    | H -1.066970 3.956492 -0.214849    |
| H 0.939374 4.033743 0.223125     | H 0.419054 4.032601 0.781790      |
| C 2.548450 -1.610537 0.057127    | C 2.546722 -1.628267 0.151460     |
| H 3.146355 -1.230096 -0.786305   | H 3.178570 -1.079826 -0.565026    |
| H 2.951346 -1.172572 0.985652    | H 2.930670 -1.426185 1.168114     |
| H 2.686341 -2.699629 0.113976    | H 2.674934 -2.704027 -0.041969    |
| C 2.549009 1.609070 0.000968     | C 2.553012 1.628537 0.006087      |
| H 2.977893 1.130143 0.896327     | H 3.106438 1.079572 0.784444      |
| H 3.130232 1.274636 -0.873697    | H 3.041904 1.427685 -0.964762     |
| H 2.679086 2.695390 0.105636     | H 2.659926 2.704130 0.212884      |

## XVIII

| Ground state optimised structure | Excited state optimised structure |
|----------------------------------|-----------------------------------|
| C -1.187001 -1.308979 -0.611868  | C -1.281800 -1.373702 -0.333480   |
| C 0.019494 -1.996264 -0.088402   | C -0.018078 -2.092370 -0.061081   |
| C 1.060382 -1.144534 -0.254277   | C 1.054424 -1.190076 -0.185117    |
| C 1.061765 1.119601 -0.294675    | C 1.052485 1.162660 -0.199883     |
| C 0.022267 1.978586 -0.160549    | C -0.008161 2.075078 -0.118673    |
| C -1.184007 1.277136 -0.665768   | C -1.274205 1.358479 -0.388863    |
| N 0.635412 -0.024625 -0.963173   | N 0.469644 -0.016543 -0.521428    |
| N -0.735476 -0.026557 -1.122983  | N -0.888190 -0.014438 -0.644903   |
| O -2.348553 -1.671492 -0.598785  | O -2.439453 -1.797088 -0.338195   |
| O -2.343582 1.645678 -0.678062   | O -2.426823 1.793944 -0.424202    |
| C -0.054273 -3.331217 0.569277   | C -0.000979 -3.520369 0.327124    |
| H -0.886150 -3.361315 1.291355   | H -1.030612 -3.872854 0.490335    |
| H -0.240980 -4.128162 -0.170485  | H 0.455445 -4.141851 -0.466238    |
| H 0.882699 -3.568098 1.097376    | H 0.588374 -3.691140 1.245715     |
| C -0.050963 3.334637 0.452714    | C 0.011210 3.514200 0.227043      |
| H -0.245087 4.106287 -0.311428   | H 0.034209 4.136660 -0.688221     |
| H -0.878039 3.386260 1.179202    | H -0.907289 3.786984 0.770652     |
| H 0.888566 3.591319 0.966775     | H 0.892784 3.779507 0.832208      |
| C 2.428378 -0.793376 0.277080    | C 2.428426 -0.802218 0.324982     |
| H 2.562565 -1.185278 1.296030    | H 2.567651 -1.163788 1.358543     |
| H 3.232621 -1.209389 -0.349307   | H 3.244813 -1.224712 -0.279429    |
| C 2.429643 0.785775 0.248006     | C 2.446975 0.789708 0.255527      |
| H 2.566432 1.214767 1.251482     | H 2.679491 1.240697 1.234013      |
| H 3.233354 1.177034 -0.394889    | H 3.219126 1.131027 -0.451782     |

**XIX**

| <b>Ground state optimised structure</b> | <b>Excited state optimised structure</b> |
|-----------------------------------------|------------------------------------------|
| C -7.272475 -2.314223 -0.039032         | C -7.278523 -2.304665 -0.001625          |
| C -5.872102 -2.276972 0.022903          | C -5.857611 -2.270242 0.053292           |
| C -5.227726 -1.049520 0.029683          | C -5.202754 -1.065520 0.049387           |
| C -5.917578 0.174794 -0.020656          | C -5.910071 0.185380 -0.008486           |
| C -7.328166 0.116167 -0.081320          | C -7.342468 0.119324 -0.063629           |
| C -7.990740 -1.091331 -0.090658         | C -8.009141 -1.076387 -0.060896          |
| H -5.279682 -3.194732 0.064450          | H -5.279705 -3.196812 0.099425           |
| C -5.119676 1.370747 -0.003048          | C -5.147537 1.389063 -0.006683           |
| H -7.907850 1.041228 -0.120346          | H -7.911126 1.050051 -0.108465           |
| H -9.082966 -1.115758 -0.139630         | H -9.101211 -1.105429 -0.103073          |
| C -3.767373 1.320758 0.059097           | C -3.738068 1.295368 0.052218            |
| C -3.076578 0.046011 0.110139           | C -3.059511 0.057278 0.108076            |
| H -3.145244 2.215778 0.073533           | H -3.116140 2.191891 0.056233            |
| N -7.942635 -3.507246 -0.089111         | N -7.928073 -3.479246 0.002401           |
| H -7.450194 -4.363660 0.159288          | H -7.425955 -4.366871 0.046363           |
| H -8.945527 -3.516412 0.089150          | H -8.947200 -3.522428 -0.034676          |
| C -5.802728 2.712054 -0.054971          | C -5.818373 2.698908 -0.067038           |
| F -6.650324 2.876816 0.991672           | F -6.689422 2.909998 0.975912            |
| F -4.933255 3.742258 -0.026867          | F -4.946748 3.732972 -0.053615           |
| F -6.544236 2.846273 -1.183231          | F -6.594623 2.858449 -1.190940           |
| O -3.855234 -1.088170 0.092018          | O -3.837585 -1.124410 0.104203           |
| O -1.865064 -0.105178 0.167699          | O -1.835504 -0.136986 0.162376           |

| Ground state optimised structure | Excited state optimised structure |
|----------------------------------|-----------------------------------|
| C -7.945651 -2.065602 0.029681   | C -7.914318 -2.087671 -0.004894   |
| C -5.959221 -0.938807 0.807666   | C -5.919424 -0.976369 0.804800    |
| C -6.175180 0.147758 -0.051745   | C -6.159256 0.154430 -0.060269    |
| C -7.319986 0.089830 -0.880753   | C -7.325039 0.088455 -0.892472    |
| C -5.229708 1.236926 -0.037971   | C -5.258422 1.248425 -0.049536    |
| H -7.520124 0.921005 -1.564707   | H -7.531604 0.929666 -1.560140    |
| C -4.160126 1.170208 0.808646    | C -4.148748 1.156068 0.831231     |
| C -3.942746 0.049881 1.688128    | C -3.906188 0.052377 1.676825     |
| H -3.416326 1.968821 0.856250    | H -3.417791 1.968031 0.884087     |
| C -5.428740 2.415954 -0.941906   | C -5.474471 2.437654 -0.928099    |
| O -4.871773 -0.974637 1.648616   | O -4.833836 -1.026540 1.641274    |
| O -3.008616 -0.088524 2.476348   | O -2.966558 -0.120943 2.477805    |
| H -5.446691 2.102553 -1.999835   | H -5.485540 2.164428 -2.001415    |
| H -4.622994 3.153491 -0.811224   | H -4.676371 3.182356 -0.780701    |
| H -6.392730 2.912009 -0.735727   | H -6.441872 2.935987 -0.721722    |
| C -6.814417 -2.035000 0.861646   | C -6.763042 -2.057149 0.834591    |
| H -6.584903 -2.850316 1.550452   | H -6.535956 -2.885970 1.508018    |
| C -8.200089 -0.973823 -0.862366  | C -8.192465 -0.984165 -0.887505   |
| N -8.822188 -3.114456 0.072054   | N -8.751304 -3.148860 0.021170    |
| H -9.522368 -3.174350 -0.666412  | H -9.566095 -3.131141 -0.596420   |
| C -8.579484 -4.323652 0.841888   | C -8.590491 -4.323460 0.866475    |
| C -9.709414 -5.318546 0.628025   | C -9.728685 -5.302876 0.631658    |
| H -8.505430 -4.060225 1.913194   | H -8.564804 -4.005257 1.925589    |
| H -7.609573 -4.774905 0.550542   | H -7.616988 -4.799136 0.643367    |
| H -9.531550 -6.229762 1.220045   | H -9.597858 -6.187223 1.273831    |
| H -10.676452 -4.888971 0.939355  | H -10.702399 -4.845661 0.874854   |
| H -9.783099 -5.612565 -0.433237  | H -9.749251 -5.643277 -0.417128   |
| C -9.412550 -1.007617 -1.750779  | C -9.403355 -1.021018 -1.772860   |
| H -9.390047 -1.865323 -2.449072  | H -9.378135 -1.878610 -2.470437   |
| H -10.346602 -1.087333 -1.164755 | H -10.339363 -1.095468 -1.189096  |
| H -9.475451 -0.091370 -2.357793  | H -9.464596 -0.104428 -2.378629   |



| Ground state optimised structure | Excited state optimised structure |
|----------------------------------|-----------------------------------|
| C -7.948830 -2.278395 -0.211493  | C -7.953464 -2.269604 -0.222341   |
| C -6.224530 -0.983269 0.900827   | C -6.219358 -0.995737 0.924672    |
| C -6.127943 -0.066637 -0.159543  | C -6.119008 -0.058518 -0.162143   |
| C -6.972088 -0.298562 -1.265023  | C -6.975636 -0.301775 -1.288038   |
| C -5.184570 1.020729 -0.052913   | C -5.202964 1.020510 -0.071289    |
| H -6.929174 0.381546 -2.120921   | H -6.922245 0.378292 -2.141659    |
| C -4.421074 1.119735 1.073011    | C -4.414717 1.101687 1.101968     |
| C -4.521016 0.175078 2.160772    | C -4.503528 0.184086 2.174028     |
| H -3.693151 1.923539 1.204965    | H -3.683737 1.906200 1.221617     |
| C -5.058846 2.016847 -1.166570   | C -5.073606 2.011356 -1.182652    |
| O -5.438096 -0.854851 2.020955   | O -5.445114 -0.878273 2.045727    |
| O -3.871471 0.194161 3.201141    | O -3.864490 0.168323 3.239397     |
| H -4.767635 1.521074 -2.108644   | H -4.766810 1.530535 -2.132505    |
| H -4.303057 2.779998 -0.928141   | H -4.321906 2.778120 -0.937489    |
| H -6.020938 2.525106 -1.351344   | H -6.030425 2.530189 -1.387617    |
| C -7.094797 -2.065756 0.893019   | C -7.093435 -2.054440 0.902981    |
| H -7.083675 -2.728808 1.758672   | H -7.100381 -2.718344 1.767776    |
| C -7.848856 -1.365139 -1.304394  | C -7.859879 -1.360508 -1.320749   |
| H -8.468168 -1.499483 -2.191824  | H -8.486806 -1.494477 -2.203048   |
| N -8.850889 -3.313410 -0.228289  | N -8.835303 -3.313342 -0.232002   |
| C -8.903943 -4.269207 0.874031   | C -8.899257 -4.264368 0.878888    |
| C -7.806390 -5.333753 0.832742   | C -7.804696 -5.332902 0.828405    |
| H -9.894266 -4.751084 0.837035   | H -9.891798 -4.738284 0.837851    |
| H -8.868656 -3.715202 1.828628   | H -8.855153 -3.706786 1.828560    |
| H -7.881134 -5.992639 1.714346   | H -7.896154 -5.995330 1.705142    |
| H -7.898172 -5.957292 -0.071590  | H -7.894522 -5.949252 -0.080250   |
| H -6.803112 -4.876406 0.830572   | H -6.800719 -4.878557 0.840799    |
| C -9.671948 -3.575583 -1.407535  | C -9.671525 -3.581247 -1.402778   |
| C -8.932021 -4.290166 -2.539282  | C -8.924221 -4.284198 -2.538342   |
| H -10.101612 -2.624269 -1.767532 | H -10.106800 -2.629824 -1.753018  |
| H -10.525332 -4.187752 -1.074309 | H -10.510968 -4.205135 -1.060837  |
| H -9.602754 -4.431023 -3.403806  | H -9.605356 -4.429148 -3.393160   |
| H -8.056240 -3.710078 -2.874552  | H -8.061344 -3.689646 -2.879229   |
| H -8.577852 -5.281685 -2.212911  | H -8.556916 -5.272239 -2.218561   |

## XXII

| Ground state optimised structure | Excited state optimised structure |
|----------------------------------|-----------------------------------|
| C -7.765715 -2.204579 0.365412   | C -7.775652 -2.194075 0.364177    |
| C -6.505252 -2.113297 0.995243   | C -6.509719 -2.099519 1.009013    |
| C -5.680854 -1.025768 0.745756   | C -5.670911 -1.030453 0.767233    |
| C -6.031370 0.014930 -0.133888   | C -6.026669 0.019505 -0.132113    |
| C -7.284506 -0.093223 -0.775154  | C -7.289399 -0.097406 -0.784073   |
| C -8.123361 -1.163744 -0.544816  | C -8.138302 -1.156942 -0.552707   |
| H -6.136949 -2.875116 1.682467   | H -6.156858 -2.857639 1.708296    |
| C -5.078084 1.079342 -0.299058   | C -5.092146 1.100917 -0.313667    |
| H -7.600317 0.684427 -1.475289   | H -7.590567 0.681529 -1.488207    |
| H -9.074458 -1.200719 -1.076649  | H -9.090047 -1.191526 -1.083250   |
| C -3.894811 1.077859 0.364048    | C -3.873785 1.051467 0.383942     |
| C -3.545641 -0.007057 1.267651   | C -3.530813 -0.002744 1.273371    |
| H -3.159159 1.875521 0.255266    | H -3.128552 1.840388 0.266856     |
| N -8.620177 -3.244544 0.628287   | N -8.613624 -3.240724 0.622339    |
| C -5.403586 2.222082 -1.224328   | C -5.412933 2.209194 -1.225286    |
| F -6.537428 2.864233 -0.838252   | F -6.575926 2.868680 -0.885732    |
| F -4.421378 3.146809 -1.278344   | F -4.438259 3.145156 -1.279024    |
| F -5.614754 1.787948 -2.495054   | F -5.634456 1.796994 -2.524125    |
| O -4.478732 -1.021867 1.410703   | O -4.488328 -1.047698 1.444879    |
| O -2.510631 -0.097844 1.903846   | O -2.497713 -0.137888 1.930201    |
| C -9.889435 -3.373866 -0.082934  | C -9.893246 -3.373793 -0.076609   |
| H -10.531314 -4.032443 0.524380  | H -10.526107 -4.032951 0.537144   |
| H -10.393896 -2.391905 -0.102680 | H -10.390196 -2.389598 -0.096408  |
| C -9.756831 -3.938236 -1.498033  | C -9.756186 -3.941923 -1.490702   |
| H -9.338499 -4.957902 -1.477317  | H -9.338573 -4.961173 -1.470043   |
| H -10.744932 -3.981504 -1.986850 | H -10.747889 -3.986220 -1.970483  |
| H -9.093297 -3.313194 -2.118393  | H -9.097866 -3.313769 -2.112376   |
| C -8.222564 -4.321881 1.530300   | C -8.216562 -4.322059 1.526361    |
| H -9.147771 -4.808639 1.879185   | H -9.142458 -4.813048 1.862919    |
| H -7.752691 -3.880021 2.426745   | H -7.749931 -3.880784 2.422616    |
| C -7.296132 -5.359916 0.895083   | C -7.282725 -5.346699 0.877942    |
| H -7.004414 -6.118091 1.641368   | H -7.002371 -6.111880 1.620485    |
| H -7.797042 -5.875605 0.059326   | H -7.774293 -5.852557 0.031535    |
| H -6.377164 -4.893314 0.503545   | H -6.360081 -4.871885 0.507069    |

## XXIII

| Ground state optimised structure | Excited state optimised structure |
|----------------------------------|-----------------------------------|
| C -7.609449 -2.268479 0.106804   | C -7.587925 -2.280554 0.061739    |
| C -5.663372 -1.046895 0.838289   | C -5.634259 -1.068759 0.838440    |
| C -5.954020 0.039349 -0.003860   | C -5.936690 0.041066 -0.015208    |
| C -7.112229 -0.069018 -0.800073  | C -7.114424 -0.069657 -0.821001   |
| C -7.927660 -1.185402 -0.774261  | C -7.920371 -1.192910 -0.811218   |
| C -5.065136 1.174438 -0.004578   | C -5.080856 1.177314 -0.013029    |
| H -7.375730 0.753826 -1.473570   | H -7.378570 0.762298 -1.480763    |
| C -3.967105 1.154845 0.809158    | C -3.971028 1.154428 0.860891     |
| C -3.667224 0.038026 1.667978    | C -3.656529 0.059354 1.695550     |
| H -3.264345 1.990704 0.843793    | H -3.292603 2.011007 0.914162     |
| N -8.435308 -3.375044 0.177276   | N -8.378026 -3.396107 0.113830    |
| C -5.351563 2.352128 -0.887634   | C -5.375592 2.353731 -0.887061    |
| O -4.544721 -1.032167 1.644406   | O -4.514979 -1.070208 1.638480    |
| O -2.702570 -0.061272 2.426660   | O -2.701869 -0.066067 2.489817    |
| C -9.487252 -3.568756 -0.814469  | C -9.495458 -3.568497 -0.811209   |
| H -10.208115 -4.289064 -0.392814 | H -10.199877 -4.276091 -0.347152  |
| H -9.071255 -4.021777 -1.741430  | H -9.115993 -4.038590 -1.744794   |
| C -10.169973 -2.249497 -1.142579 | C -10.164547 -2.240733 -1.128303  |
| H -10.971172 -2.419984 -1.880346 | H -10.986620 -2.413368 -1.841235  |
| H -10.637651 -1.846201 -0.225915 | H -10.603759 -1.822642 -0.204497  |
| C -9.133198 -1.270086 -1.684874  | C -9.129111 -1.281790 -1.706801   |
| H -8.812983 -1.608828 -2.689182  | H -8.820199 -1.640618 -2.708452   |
| H -9.568651 -0.264959 -1.818906  | H -9.555052 -0.274654 -1.852713   |
| C -6.454808 -2.192075 0.924659   | C -6.423081 -2.196961 0.912741    |
| H -5.381241 2.051265 -1.949200   | H -5.403448 2.076272 -1.959111    |
| H -4.582898 3.130385 -0.768157   | H -4.611326 3.137255 -0.761711    |
| H -6.335015 2.793108 -0.649786   | H -6.361983 2.803082 -0.656034    |
| C -6.071242 -3.304917 1.871995   | C -6.054199 -3.322095 1.841458    |
| H -5.683780 -2.876397 2.811486   | H -5.610429 -2.909286 2.761588    |
| H -5.236062 -3.889285 1.439782   | H -5.262024 -3.939806 1.372086    |
| C -7.257179 -4.225608 2.148760   | C -7.263976 -4.195776 2.154102    |
| H -7.982213 -3.723268 2.814477   | H -7.973954 -3.652289 2.803143    |

|                                |                                |
|--------------------------------|--------------------------------|
| H -6.922792 -5.145924 2.655079 | H -6.957760 -5.111005 2.685779 |
| C -7.954964 -4.579631 0.843865 | C -7.964237 -4.580375 0.861504 |
| H -7.261825 -5.141102 0.179097 | H -7.285760 -5.189626 0.224029 |
| H -8.828662 -5.225943 1.029618 | H -8.866845 -5.180851 1.052503 |

## XXIV

| Ground state optimised structure | Excited state optimised structure |
|----------------------------------|-----------------------------------|
| C -5.260236 -0.745136 2.769162   | C -5.261274 -0.735028 2.754537    |
| C -4.864683 0.446944 2.177680    | C -4.848738 0.430447 2.149678     |
| C -5.761196 1.371956 1.624818    | C -5.763828 1.367106 1.571727     |
| C -7.128769 1.038727 1.697108    | C -7.148644 1.021119 1.667908     |
| C -7.559781 -0.138088 2.280726   | C -7.581662 -0.139773 2.268521    |
| H -4.481484 -1.403189 3.156153   | H -4.487811 -1.390125 3.157045    |
| C -5.246863 2.569771 1.025508    | C -5.281370 2.539542 0.956833     |
| H -7.863805 1.730388 1.271636    | H -7.881194 1.711496 1.237410     |
| H -8.629488 -0.350081 2.298507   | H -8.651735 -0.348438 2.299003    |
| C -3.902648 2.789059 0.970007    | C -3.873777 2.728632 0.930201     |
| C -2.979708 1.825208 1.587039    | C -2.962340 1.805324 1.542028     |
| H -5.963071 3.292112 0.629363    | H -5.980032 3.270387 0.555492     |
| O -3.509151 0.698219 2.152317    | O -3.491266 0.651342 2.144909     |
| O -1.766627 1.987314 1.633759    | O -1.730823 1.945057 1.602843     |
| N -7.065857 -2.211615 3.474489   | N -7.062823 -2.203533 3.466147    |
| C -6.104000 -3.169328 4.010656   | C -6.098025 -3.149021 4.028072    |
| C -5.466959 -4.077103 2.956066   | C -5.468946 -4.076467 2.985622    |
| H -6.637108 -3.779929 4.757864   | H -6.632980 -3.741444 4.787147    |
| H -5.324550 -2.618161 4.566770   | H -5.318489 -2.583438 4.565998    |
| H -4.717451 -4.738518 3.423203   | H -4.726760 -4.733445 3.469510    |
| H -6.227777 -4.709748 2.469444   | H -6.232449 -4.712751 2.508950    |
| H -4.963304 -3.488025 2.171615   | H -4.957996 -3.501833 2.195726    |
| C -8.479301 -2.576352 3.478838   | C -8.476573 -2.579337 3.484603    |
| C -8.976404 -3.175092 2.161448   | C -8.968058 -3.180669 2.165949    |
| H -9.080569 -1.690592 3.751825   | H -9.078121 -1.694700 3.757440    |
| H -8.620948 -3.302298 4.296223   | H -8.604581 -3.306472 4.301719    |
| H -10.054867 -3.399972 2.225583  | H -10.042980 -3.417028 2.239488   |
| H -8.819309 -2.479236 1.320360   | H -8.824316 -2.479293 1.327718    |
| H -8.442633 -4.111441 1.929147   | H -8.426018 -4.110622 1.929310    |
| N -3.210513 3.880507 0.431424    | N -3.210112 3.832648 0.416155     |
| C -3.561924 4.840436 -0.493755   | C -3.578262 4.858870 -0.438246    |
| H -2.218324 3.902381 0.700473    | H -2.211899 3.851593 0.676557     |

|                                |                                |
|--------------------------------|--------------------------------|
| O -2.734380 5.702616 -0.804951 | O -2.753167 5.752205 -0.667971 |
| C -4.938301 4.800520 -1.107220 | C -4.940092 4.848837 -1.083603 |
| H -4.933566 5.467955 -1.979739 | H -4.909098 5.553809 -1.925871 |
| H -5.222371 3.781909 -1.418938 | H -5.221317 3.847111 -1.444202 |
| H -5.695875 5.167920 -0.393539 | H -5.712842 5.193241 -0.374877 |
| C -6.634264 -1.063047 2.851692 | C -6.647666 -1.058356 2.843285 |

## 9. Dependence of the range-separation parameter on the basis set and molecular geometry

The effect on the optimal value of  $\gamma$  for different basis sets were explored in earlier studies<sup>26,27</sup> and found to be minimal. In the course of our work, we have also performed a limited study using a few molecules in the test subset. The results are given in Table S20 and we concluded that the basis set effect on the tuned  $\gamma$  is not significant.

Table S20: Tuned range separation parameters (Bohr<sup>-1</sup>) with the LC-BLYP\* functional, as determined using the 6-31+G(d) and 6-311+G(d) basis sets. The tuning procedure was carried out in the gas phase.

|             | <b>6-31+G(d)</b> | <b>6-311+G(d)</b> |
|-------------|------------------|-------------------|
| <b>I</b>    | 0.2219           | 0.2261            |
| <b>XIII</b> | 0.2829           | 0.2821            |
| <b>XIX</b>  | 0.2468           | 0.2467            |

In addition, a truly consistent approach for calculations carried out with tuned  $\gamma$  necessitates the use of  $\gamma$  that are re-calculated with changes in molecular geometry. For geometry optimizations carried out with a particular  $\gamma$ , the optimal  $\gamma$  corresponding to the minimum should be re-determined and checked for consistency. Otherwise, geometry optimization should be repeated using the new-found  $\gamma$  and the process repeated till self-consistency is obtained. This is indeed a cumbersome procedure. There is previous work<sup>28</sup> that reports the dependence of  $\gamma$  on the molecular geometry and found it to be small. We have also considered this aspect in the course of our work and carried out studies albeit on a limited scale and arrived at the same conclusion- variation of  $\gamma$  between optimized molecular geometries in the ground and excited state is not significant. The results are summarized in Table S21.

Table S21: Optimally tuned range separation parameters (Bohr<sup>-1</sup>) for LC-BLYP\*/6-31+G\*, as determined at the ground and excited state optimised geometries. The tuning procedure was carried out in the gas phase.

|             | <b>Ground state opt. geom.</b> | <b>Excited state opt. geom.</b> |
|-------------|--------------------------------|---------------------------------|
| <b>I</b>    | 0.2219                         | 0.2187                          |
| <b>XIII</b> | 0.2829                         | 0.2801                          |

## References

1. N. Boens, W. Qin, N. Basaric, J. Hofkens, M. Ameloot, J. Pouget, J. P. Lefevre, B. Valeur, E. Gratton, M. vandeVen, N. D. Silva, Jr., Y. Engelborghs, K. Willaert, A. Sillen, G. Rumbles, D. Phillips, A. J. Visser, A. van Hoek, J. R. Lakowicz, H. Malak, I. Gryczynski, A. G. Szabo, D. T. Krajcarski, N. Tamai and A. Miura, *Anal. Chem.*, 2007, **79**, 2137-2149.
2. K. A. Abdullah and T. J. Kemp, *J. Photochem.*, 1985, **28**, 61-69.
3. W. R. Ware and W. Rothman, *Chem. Phys. Lett.*, 1976, **39**, 449-453.
4. T. Sander, H. G. Löhmannsröben and H. Langhals, *J. Photochem. Photobiol., A*, 1995, **86**, 103-108.
5. M. Siegmund and J. Bendig, *Ber. Bunsen-Ges. Phys. Chem*, 1978, **82**, 1061-1068.
6. E. Birckner, U. W. Grummt, A. H. Göller, T. Pautzsch, D. A. M. Egbe, M. Al-Higari and E. Klemm, *J. Phys. Chem. A*, 2001, **105**, 10307-10315.
7. R. Mabbs, N. Nijegorodov and W. S. Downey, *Spectrochim. Acta, Part A*, 2003, **59**, 1329-1339.
8. E. M. Kosower, R. Giniger, A. Radkowsky, D. Hebel and A. Shusterman, *J. Phys. Chem.*, 1986, **90**, 5552-5557.
9. G. Jones, W. R. Jackson, C. Y. Choi and W. R. Bergmark, *J. Phys. Chem.*, 1985, **89**, 294-300.
10. T. Chatterjee, D. Roy, A. Das, A. Ghosh, P. P. Bag and P. K. Mandal, *RSC Adv.*, 2013, **3**, 24021.
11. "Physical Constants of Organic Compounds," in CRC Handbook of Chemistry and Physics, 96th Edition, 2015, W. M. Haynes, ed., CRC Press/Taylor & Francis, Boca Raton, FL.
12. W. J. Hehre, *J. Chem. Phys.*, 1972, **56**, 2257.
13. P. C. Hariharan and J. A. Pople, *Theor. Chem. Acc.*, 1973, **28**, 213-222.
14. M. M. Francl, W. J. Pietro, W. J. Hehre, J. S. Binkley, M. S. Gordon, D. J. DeFrees and J. A. Pople, *J. Chem. Phys.*, 1982, **77**, 3654-3665.
15. M. J. Frisch, J. A. Pople and J. S. Binkley, *J. Chem. Phys.*, 1984, **80**, 3265.
16. R. Krishnan, J. S. Binkley, R. Seeger and J. A. Pople, *J. Chem. Phys.*, 1980, **72**, 650.
17. F. Weigend and R. Ahlrichs, *Phys. Chem. Chem. Phys.*, 2005, **7**, 3297-3305.



18. T. H. Dunning, *J. Chem. Phys.*, 1989, **90**, 1007.
19. R. A. Kendall, T. H. Dunning and R. J. Harrison, *J. Chem. Phys.*, 1992, **96**, 6796.
20. D. E. Woon and T. H. Dunning, *J. Chem. Phys.*, 1993, **98**, 1358-1371.
21. J. Cerezo, F. J. Avila Ferrer, G. Prampolini and F. Santoro, *J. Chem. Theory Comput.*, 2015, **11**, 5810-5825.
22. F. J. Avila Ferrer, R. Improta, F. Santoro and V. Barone, *Phys. Chem. Chem. Phys.*, 2011, **13**, 17007-17012.
23. B. Moore II, R. L. Schrader, K. Kowalski and J. Autschbach, *ChemistryOpen*, 2017, **6**, 385-392.
24. B. Moore II, H. Sun, N. Govind, K. Kowalski and J. Autschbach, *J. Chem. Theory Comput.*, 2015, **11**, 3305-3320.
25. A. R. Allouche, *J. Comput. Chem.*, 2011, **32**, 174-182.
26. M. E. Foster and B. M. Wong, *J. Chem. Theory Comput.*, 2012, **8**, 2682-2687
27. H. Sun and J. Autschbach, *J. Chem. Theory Comput.*, 2014, **10**, 1035-1047
28. D. Jacquemin, B. Moore II, A. Planchat, C. Adamo and J. Autschbach, *J. Chem. Theory Comput.*, 2014, **10**, 1677-1685
